# Supplementary material for: Fatigue in patients with chronic obstructive pulmonary disease: protocol of the Dutch multicentre, longitudinal, observational FAntasTIGUE study
Source: PubMed Central journal article supplement — BMJ Open. 2018 Apr 10;8(4):e021745. doi: 10.1136/bmjopen-2018-021745 (PMC5898336; doi:10.1136/bmjopen-2018-021745), 2018-04-10
Supplement: bmjopen-2018-021745.draft_revisions.pdf [file bmjopen-2018-021745.draft_revisions.pdf]

# BMJ Open

BMJ Open is committed to open peer review. As part of this commitment we make the peer review history of every article we publish publicly available.

When an article is published we post the peer reviewers' comments and the authors' responses online. We also post the versions of the paper that were used during peer review. These are the versions that the peer review comments apply to.

The versions of the paper that follow are the versions that were submitted during the peer review process. They are not the versions of record or the final published versions. They should not be cited or distributed as the published version of this manuscript.

BMJ Open is an open access journal and the full, final, typeset and author-corrected version of record of the manuscript is available on our site with no access controls, subscription charges or pay-per-view fees (<http://bmjopen.bmj.com>).

If you have any questions on BMJ Open's open peer review process please email [info.bmjopen@bmj.com](mailto:info.bmjopen@bmj.com)

# BMJ Open

## Fatigue in patients with Chronic Obstructive Pulmonary Disease: protocol of the longitudinal, observational *F*antast*IGUE* study

|                               |                                                                                                                                                                                                                                                                                                                                                                                                                                                                                                                                                                                                                                                                                                                                                                                                                                                                                                                                                                                                                                                                                                                                                                                                                                                                                                                                                                                                                                                                                                                                                                                                                                                                                                                                                                                                                                                                                                                                                                                                                                                                                                                                      |
|-------------------------------|--------------------------------------------------------------------------------------------------------------------------------------------------------------------------------------------------------------------------------------------------------------------------------------------------------------------------------------------------------------------------------------------------------------------------------------------------------------------------------------------------------------------------------------------------------------------------------------------------------------------------------------------------------------------------------------------------------------------------------------------------------------------------------------------------------------------------------------------------------------------------------------------------------------------------------------------------------------------------------------------------------------------------------------------------------------------------------------------------------------------------------------------------------------------------------------------------------------------------------------------------------------------------------------------------------------------------------------------------------------------------------------------------------------------------------------------------------------------------------------------------------------------------------------------------------------------------------------------------------------------------------------------------------------------------------------------------------------------------------------------------------------------------------------------------------------------------------------------------------------------------------------------------------------------------------------------------------------------------------------------------------------------------------------------------------------------------------------------------------------------------------------|
| Journal:                      | <i>BMJ Open</i>                                                                                                                                                                                                                                                                                                                                                                                                                                                                                                                                                                                                                                                                                                                                                                                                                                                                                                                                                                                                                                                                                                                                                                                                                                                                                                                                                                                                                                                                                                                                                                                                                                                                                                                                                                                                                                                                                                                                                                                                                                                                                                                      |
| Manuscript ID                 | bmjopen-2018-021745                                                                                                                                                                                                                                                                                                                                                                                                                                                                                                                                                                                                                                                                                                                                                                                                                                                                                                                                                                                                                                                                                                                                                                                                                                                                                                                                                                                                                                                                                                                                                                                                                                                                                                                                                                                                                                                                                                                                                                                                                                                                                                                  |
| Article Type:                 | Protocol                                                                                                                                                                                                                                                                                                                                                                                                                                                                                                                                                                                                                                                                                                                                                                                                                                                                                                                                                                                                                                                                                                                                                                                                                                                                                                                                                                                                                                                                                                                                                                                                                                                                                                                                                                                                                                                                                                                                                                                                                                                                                                                             |
| Date Submitted by the Author: | 15-Jan-2018                                                                                                                                                                                                                                                                                                                                                                                                                                                                                                                                                                                                                                                                                                                                                                                                                                                                                                                                                                                                                                                                                                                                                                                                                                                                                                                                                                                                                                                                                                                                                                                                                                                                                                                                                                                                                                                                                                                                                                                                                                                                                                                          |
| Complete List of Authors:     | <p>Goërtz, Yvonne; Centro of Expertise for Chronic Organ Failure, Department of Research and Education</p> <p>Looijmans, Milou; Radboud University Nijmegen Medical Centre, Department of Medical Psychology and Department of Pulmonary Diseases</p> <p>Prins, Judith; Radboud University Nijmegen Medical Centre, Department of Medical Psychology and Department of Pulmonary Diseases</p> <p>Janssen, Daisy; Centro of Expertise for Chronic Organ Failure, Department of Research and Education; Maastricht University Medical Centre, Centro of Expertise for Palliative Care</p> <p>Thong, Melissa S. Y.; Academic Medical Centre University of Amsterdam, Amsterdam Public Health Research Institute, Department of Medical Psychology</p> <p>Peters, Jeannette; Radboud University Nijmegen Medical Centre, Department of Medical Psychology and Department of Pulmonary Diseases</p> <p>Burtin, Chris ; Hasselt University, Faculty of Medicine and Life Sciences, REVAL - Rehabilitation Research Center, BIOMED- Biomedical Research Institute</p> <p>Meertens-Kerris, Yvonne; Centro of Expertise for Chronic Organ Failure, Member of the Patient Advisory Board</p> <p>Coors, Arnold; Radboud University Nijmegen Medical Centre, Member of the Patient Advisory Board</p> <p>Muris, Jean; Maastricht University, CAPHRI Care and Public Health Research Institute, Department of Family Medicine</p> <p>Sprangers, Mirjam; Academic Medical Centre University of Amsterdam, Amsterdam Public Health Research Institute, Department of Medical Psychology</p> <p>Wouters, Emiel; Centro of Expertise for Chronic Organ Failure, Research and Education; Maastricht University Medical Centre, Department of Respiratory Medicine</p> <p>Vercoulen, Jan; Radboud University Nijmegen Medical Centre, Department of Medical Psychology and Department of Pulmonary Diseases</p> <p>Spruit, Martijn; Centro of Expertise for Chronic Organ Failure, Research and Education; Hasselt University, Faculty of Medicine and Life Sciences, REVAL - Rehabilitation Research Center, BIOMED- Biomedical Research Institute</p> |
| Keywords:                     | Chronic Obstructive Pulmonary Disease, Fatigue, Underlying factors                                                                                                                                                                                                                                                                                                                                                                                                                                                                                                                                                                                                                                                                                                                                                                                                                                                                                                                                                                                                                                                                                                                                                                                                                                                                                                                                                                                                                                                                                                                                                                                                                                                                                                                                                                                                                                                                                                                                                                                                                                                                   |

1  
2  
3  
4  
5  
6  
7  
8  
9  
10  
11  
12  
13  
14  
15  
16  
17  
18  
19  
20  
21  
22  
23  
24  
25  
26  
27  
28  
29  
30  
31  
32  
33  
34  
35  
36  
37  
38  
39  
40  
41  
42  
43  
44  
45  
46  
47  
48  
49  
50  
51  
52  
53  
54  
55  
56  
57  
58  
59  
60

SCHOLARONE™  
Manuscripts

For peer review only

**TITLE**

Fatigue in patients with Chronic Obstructive Pulmonary Disease: protocol of the longitudinal, observational *FAntasTIGUE* study

**AUTHORS:**

Yvonne M.J. Goërtz\*<sup>1</sup>, Milou Looijmans\*<sup>2</sup>, Judith B. Prins<sup>2</sup>, Daisy J.A. Janssen<sup>1,3</sup>, Melissa S.Y. Thong<sup>4</sup>, Jeannette B. Peters<sup>2</sup>, Chris Burtin<sup>5</sup>, Yvonne Meertens-Kerris<sup>6</sup>, Arnold Coors<sup>7</sup>, Jean W.M. Muris<sup>8</sup>, Mirjam A.G. Sprangers<sup>4</sup>, Emiel F.M. Wouters<sup>1,9</sup>, Jan H. Vercoulen<sup>2</sup>, Martijn A. Spruit<sup>1,5,9,10</sup>

\*shared first authors

**AFFILIATIONS:**

<sup>1</sup>Department of Research and Education, Ciro, Centre of Expertise for Chronic Organ Failure, Horn, The Netherlands.

<sup>2</sup> Department of Medical Psychology and Department of Pulmonary Diseases, Radboud University Nijmegen Medical Centre, Nijmegen, The Netherlands.

<sup>3</sup>Centre of Expertise for Palliative Care, Maastricht University Medical Centre (MUMC+), Maastricht, The Netherlands.

<sup>4</sup> Department of Medical Psychology, Amsterdam Public Health Research Institute, Academic Medical Centre University of Amsterdam, Amsterdam, The Netherlands.

<sup>5</sup>REVAL - Rehabilitation Research Center, BIOMED - Biomedical Research Institute, Faculty of Medicine and Life Sciences, Hasselt University, Diepenbeek, Belgium.

<sup>6</sup> Member of the Patient Advisory Board, Ciro, Centre of Expertise for Chronic Organ Failure, Horn, the Netherlands.

<sup>7</sup> Member of the Patient Advisory Board, Radboud University Nijmegen Medical Centre, Nijmegen, the Netherlands.

<sup>8</sup> Department of Family Medicine, CAPHRI Care and Public Health Research Institute, Maastricht University, Maastricht, The Netherlands.

<sup>9</sup>Department of Respiratory Medicine, Maastricht University Medical Centre (MUMC+), Maastricht, The Netherlands.

<sup>10</sup> NUTRIM School of Nutrition and Translational Research in Metabolism, Maastricht, Netherlands.

**CORRESPONDENCE TO:**

Full name: Yvonne M.J. Goërtz

Postal address: Ciro, Center of Expertise for Chronic Organ Failure, Department of Research and Education, 6085 NM Horn, The Netherlands

1  
2  
3 Mail: [yvonnegoertz@ciro-horn.nl](mailto:yvonnegoertz@ciro-horn.nl)

4 Tel.:(0)475 587 602  
5  
6  
7

8 **WORD COUNT: 2834**

9 **WORD COUNT ABSTRACT: 300**  
10  
11  
12  
13  
14

## 15 **ABSTRACT**

16 *Introduction:* Fatigue is the second most common symptom in patients with Chronic Obstructive  
17 Pulmonary Disease (COPD), and has most likely a multi-causal origin. Approximately 50% of clinically  
18 stable patients with COPD experience abnormal fatigue. Despite its high prevalence, fatigue is often  
19 ignored in daily practice. For this reason, little is known about the underlying determinants of fatigue  
20 in patients with COPD. Therefore, the primary aim of this study is to identify the physical, systemic,  
21 psychological, and behavioural factors that precipitate and perpetuate fatigue in patients with  
22 COPD. Moreover, the secondary aim is to evaluate the impact of exacerbation-related  
23 hospitalizations on fatigue and to better understand the association between fatigue and 2-year all-  
24 cause hospitalization and mortality in patients with COPD. This manuscript describes the protocol of  
25 the *FAntasTIGUE* study and gives an overview of the possible strengths, weaknesses and clinical  
26 implications.  
27  
28

29 *Methods and analysis:* A two-year longitudinal, observational study, enrolling 400 patients with  
30 clinically stable COPD has been designed. Fatigue, the primary outcome, will be measured by the  
31 subjective fatigue subscale of the Checklist Individual Strength (CIS-Fatigue). The secondary outcome  
32 is the day-to-day/diurnal fatigue, registered in a subsample (n=60) by Ecological Momentary  
33 Assessment (EMA). CIS-Fatigue and EMA will be evaluated at baseline, and at 4, 8 and 12 months.  
34 The precipitating and perpetuating factors of fatigue (physical, psychological, behavioural, and  
35 systemic factors), will be assessed at baseline and at 12 months. Additional assessments will be  
36 conducted following hospitalization due to an exacerbation of COPD that occurs between baseline  
37 and 12 months. Finally, at 18 and 24 months the participants will be followed-up on their fatigue,  
38 number of exacerbations, exacerbation-related hospitalization, and survival.  
39  
40  
41  
42  
43  
44  
45  
46  
47  
48

49 *Ethics and dissemination:* This protocol was approved by the Medical research Ethics Committees  
50 United (MEC-U), Nieuwegein, the Netherlands (NL60484.100.17). It has been registered at the Dutch  
51 Trial Register (NTR6933).  
52  
53  
54  
55  
56  
57  
58  
59  
60

## STRENGTHS AND LIMITATIONS OF THIS STUDY

- The present study is a large, longitudinal, multicenter study evaluating a wide range of possible precipitating and perpetuating factors of moderate to severe fatigue in patients with COPD.
- The Ecological Momentary Assessment data will give us more insight in the diurnal variations of fatigue.
- The longitudinal design enables to examine the association between fatigue, exacerbation-related hospitalizations and mortality.
- The perpetuating- and precipitating factors have been carefully selected, it is –however- possible that there are other factors that contribute to fatigue in COPD that will be missed.

## INTRODUCTION

Fatigue, the subjective feeling of tiredness or exhaustion, is next to dyspnoea the most common and distressing symptom in patients with Chronic Obstructive Pulmonary Disease (COPD).[1] It affects the ability to perform activities of daily living and impacts the patient's quality of life (QoL).[2, 3] Among patients with stable moderate to severe COPD, around fifty percent experiences moderate to severe fatigue,[4] which is significantly higher compared to elderly, non-COPD subjects.[5] Nevertheless, despite its high prevalence and significant negative health consequences, fatigue remains often undiagnosed and, in turn, untreated.[6] This might be due to the underrepresentation of fatigue questions in commonly used health status assessment tools.[7, 8] Moreover, relatively few studies have focused on the symptom fatigue and, therefore, little is known about the precipitating and perpetuating factors of moderate to severe fatigue in patients with COPD. Consequently, specific interventions aimed at reducing COPD-related fatigue are lacking. A better insight into the underlying determinants, will provide guidance for the development of personalized interventions for this important yet disregarded symptom in patients with COPD.[9]

Multiple precipitating factors are expected to play a role in the cause of COPD-related fatigue.[9] It has been suggested that COPD-specific features are associated with fatigue, since the prevalence of fatigue is higher in patients with COPD compared to elderly control subjects.[5] However, evidence suggests that fatigue is not related to the degree of airflow limitation.[4] This indicates that the degree of airflow limitation may not be the primary underlying cause of moderate to severe fatigue in patients with COPD. On the other hand, a COPD exacerbation precipitates moderate to severe fatigue.[5, 10] However, the size of the impact of an exacerbation-related hospitalization on fatigue remains to be clarified.

Next to precipitating factors, various physical, systemic, psychological, and behavioural factors are assumed to perpetuate moderate to severe fatigue in patients with COPD. Generally, studies report significant, weak-to-moderate associations between fatigue and health status, exercise performance, physical activity, functional impairments, sleep quality, symptoms of anxiety or depression, and mood status.[2, 5, 11-15] Moreover, research indicates that COPD is associated with low-grade systemic inflammation.[16] Nonetheless, whether and to what extent low-grade systemic inflammation is related to fatigue needs to be further explored.

Thus, fatigue in COPD is a complex symptom, due to a combination of precipitating and perpetuating factors. To date, the abovementioned factors have rarely been assessed comprehensively in one

1  
2  
3 study in patients with COPD.[17] Moreover, the role of sleep apnoea, comorbidities, medication, and  
4 exacerbation-related hospitalizations are unknown. Therefore, we have designed a longitudinal,  
5 observational study, which evaluates a wide range of possible underlying factors of moderate to  
6 severe fatigue in patients with COPD. This manuscript describes the protocol of the *FAntasTIGUE*  
7 study and gives an overview of its possible strengths, weaknesses and clinical implications.  
8  
9  
10

### 11 *Objectives of this study*

12 The primary objectives of the *FAntasTIGUE* study are:

- 13 1.1 To chart the course of fatigue in patients with COPD.
- 14 1.2 To identify physical, systemic, psychological, and behavioural factors that precipitate and/or  
15 perpetuate fatigue in patients with COPD.
- 16 1.3 To identify the impact of exacerbation-related hospitalizations on fatigue and its  
17 perpetuating factors.
- 18 1.4 To better understand the association between baseline fatigue and 2-year all-cause  
19 hospitalization and mortality in patients with COPD.

20 The secondary objective of this study is:

- 21 2. To identify diurnal differences in fatigue by augmenting traditional questionnaire data with  
22 Ecological Momentary Assessment (EMA).

## 23 **METHODS**

24 The *FAntasTIGUE* study is a collaboration between CIRO (Horn, The Netherlands), Radboud  
25 university medical centre (Nijmegen, The Netherlands), Academic Medical Centre (Amsterdam, The  
26 Netherlands), Maastricht University Medical Centre (Maastricht, The Netherlands), and Hasselt  
27 University (Diepenbeek, Belgium). The consortium consists of members from various disciplines and  
28 backgrounds (e.g. chest physicians, clinical psychologists, an elderly care specialist, a cardiologist, a  
29 general practitioner, and researchers), to ensure necessary know-how to enable the successful  
30 completion of the project. Moreover, a patient advisory board is closely involved to advice and  
31 monitor the *FAntasTIGUE* project, by providing valuable insight from the patient perspective.  
32  
33  
34  
35

### 36 **STUDY DESIGN**

37 A two-year longitudinal, observational study, enrolling patients with clinically stable COPD has been  
38 designed (Figure 1). The assessments at baseline, 12 months, and during the first days of a possible  
39  
40  
41  
42  
43  
44  
45  
46  
47  
48  
49  
50  
51  
52



1  
2  
3 exacerbation-related hospitalization will be performed in a hospital setting. The remaining  
4 measurements at 4, 8, 18, and 24 months will take place at the patients' homes.  
5  
6

7  
8 The primary outcome fatigue severity will be assessed with a questionnaire at baseline, and at 4, 8,  
9 12, 18 and 24 months, as well as during exacerbation-related hospitalizations and two weeks after  
10 discharge. The secondary outcome, day-to-day/diurnal variation in fatigue, will be registered using  
11 Ecological Momentary Assessment (EMA) in a subsample (n=60) at baseline, and at 4, 8 and 12  
12 months. Selection is based on convenient sampling, a "first-come, first-serve" approach. The  
13 precipitating and perpetuating factors of moderate to severe fatigue in patients with COPD (physical,  
14 psychological, behavioural, and systemic factors), will be assessed at baseline and at 12 months.  
15 Also, when patients are admitted to the hospital between baseline and 12 months due to an  
16 exacerbation of COPD, some tests will be repeated during the first days of hospitalization, and two  
17 weeks after discharge. At last, at 18 and 24 months the participants will be followed-up on their  
18 fatigue, number of exacerbations, exacerbation-related hospitalization and survival.  
19  
20  
21  
22  
23  
24  
25

## 26 27 **ELIGIBILITY CRITERIA**

28 To be eligible, a subject must meet the following criteria:

- 29 1. A diagnosis of COPD according to the Global Strategy for the Diagnosis, Management, and  
30 Prevention of COPD (GOLD, grade 1A to 4D);[18]
- 31 2. No exacerbation-related hospitalization less than 4 weeks preceding enrolment;
- 32 3. No use of oral corticosteroids and/or antibiotics less than 4 weeks preceding enrolment;
- 33 4. Provided written informed consent.

34  
35  
36  
37 Patients lacking a sufficient understanding of the Dutch language and/or participating in concurrent  
38 intervention studies will be excluded.  
39  
40  
41

42 Extra eligibility criteria for the EMA sub-study are:

- 43 1. Access to the internet at home (Wi-Fi);
  - 44 2. Able to operate a smartphone/iPod.
- 45  
46  
47  
48

## 49 **RECRUITMENT**

50 Participants will be recruited at the outpatient clinics of the Department of Respiratory Medicine in  
51 Maastricht and the Department of Pulmonary Diseases in Nijmegen, and from the registration  
52 Network of Family Practices (RNH) of Maastricht University.[19] Eligible patients from the outpatient  
53 clinics will be informed about the research by their physician during their pulmonary consultation  
54 and are asked if the investigator may contact them to provide detailed information. Patients  
55  
56  
57  
58

1  
2  
3 recruited via the RNH network will receive a letter on behalf of their general practitioner introducing  
4 the research project. In case the patient agrees to participate, an appointment for the baseline  
5 assessment at the hospital will be made. Written informed consent will be obtained at the beginning  
6 of this visit.  
7  
8  
9

## 10 **OUTCOMES**

### 11 *Primary outcome*

12 Fatigue severity will be measured by the subjective fatigue subscale of the Checklist Individual  
13 Strength (CIS-Fatigue).[20] The CIS-Fatigue consists of eight items scored on a seven-point Likert  
14 scale. The scores range from 8 (normal fatigue) to 56 (most severe fatigue). A score of 26 or lower  
15 indicates normal fatigue, scores between 27 to 35 indicate moderate fatigue and a score of 36 or  
16 higher indicates severe fatigue. The CIS-Fatigue is a standardized and validated questionnaire that  
17 has been used in healthy subjects,[21-23] and among various patient populations including  
18 COPD.[20, 24-26] The CIS-Fatigue will be administered at baseline, and at 4, 8, 12, 18 and 24 months,  
19 as well as during exacerbation-related hospitalizations and two weeks after discharge.  
20  
21  
22  
23  
24  
25  
26  
27

### 28 *Secondary outcome*

29 Day-to-day/diurnal variations of fatigue will be measured in a subsample (n=60) with Ecological  
30 Momentary Assessment (EMA).[27, 28] EMA involves repeated measurements of the participant's  
31 behaviour and context in vivo and in real time. In the current study, the participants will be given an  
32 iPod for the duration of the study with the EMA application ([www.psymate.eu](http://www.psymate.eu)) installed. The  
33 participants will be prompted to answer questions about their fatigue, context and surroundings, 8  
34 times per day at random moments between 7:30 a.m. and 10:30 p.m. for 5 consecutive days at  
35 baseline, and at 4, 8 and 12 months. Patients will be given instructions to carry the device with them  
36 at all times for 5 consecutive days. Furthermore, they will be requested to fill out the questions  
37 immediately after the alert and to keep a normal day/night routine.  
38  
39  
40  
41  
42  
43  
44

### 45 *Explanatory factors*

46 Table 1 provides an overview of the precipitating and perpetuating factors of moderate to severe  
47 fatigue that will be assessed at baseline, and at months 4, 8, 12, 18 and 24, as well as during non-  
48 elective, exacerbation-related hospitalizations and two weeks after discharge.  
49  
50  
51  
52  
53  
54  
55  
56  
57  
58  
59  
60

Table 1 Overview outcome measurements

|                                               |                                                                                                                     | Number (n)                                         | 0 months | 4 months | 8 months | 12 months | 18 months | 24 months | Exacerbation-related hospitalizations* |
|-----------------------------------------------|---------------------------------------------------------------------------------------------------------------------|----------------------------------------------------|----------|----------|----------|-----------|-----------|-----------|----------------------------------------|
| <b>Fatigue</b>                                | Subjective fatigue subscale of the Checklist Individual Strength (CIS-Fatigue) [20]                                 | 400                                                | •        | •        | •        | •         | •         | •         | •                                      |
|                                               | Ecological Momentary Assessment (EMA) [27 28]                                                                       | 60                                                 | •        | •        | •        | •         |           |           |                                        |
| <b>Socio-demographic factors</b>              | Gender                                                                                                              | 400                                                | •        |          |          |           |           |           |                                        |
|                                               | Age                                                                                                                 | 400                                                | •        |          |          |           |           |           |                                        |
|                                               | Social-economic status (SES) [33]                                                                                   | 400                                                | •        |          |          |           |           |           |                                        |
|                                               | Marital status                                                                                                      | 400                                                | •        |          |          | •         |           |           |                                        |
|                                               | Survival status                                                                                                     | 400                                                | •        | •        | •        | •         | •         | •         |                                        |
| <b>Physical factors</b>                       | Current medication                                                                                                  | 400                                                | •        |          |          | •         |           |           |                                        |
|                                               | Charlson Comorbidity Index (CCI) [34]                                                                               | 400                                                | •        |          |          | •         |           |           |                                        |
|                                               | Symptoms checklist [35]                                                                                             | 400                                                | •        |          |          | •         |           |           |                                        |
|                                               | mMRC dyspnoea scale [36]                                                                                            | 400                                                | •        | •        | •        | •         |           |           | •                                      |
|                                               | Exacerbations last 4 or 6 months (as appropriate)                                                                   | 400                                                | •        | •        | •        | •         | •         | •         |                                        |
|                                               | All-cause hospitalizations                                                                                          | 400                                                | •        | •        | •        | •         | •         | •         |                                        |
|                                               | Body Mass Index (BMI)                                                                                               | 400                                                | •        |          |          | •         |           |           |                                        |
|                                               | Waist circumference                                                                                                 | 400                                                | •        |          |          | •         |           |           |                                        |
|                                               | Bioelectrical impedance analyses [37]                                                                               | 400                                                | •        |          |          | •         |           |           |                                        |
|                                               | 6 Minute Walk Test (6MWT) [38]                                                                                      | 400                                                | •        |          |          | •         |           |           |                                        |
|                                               | Short Physical Performance Battery (SPPB) [39]                                                                      | 400                                                | •        |          |          | •         |           |           |                                        |
|                                               | Lower-limb muscle function (MicroFet2 Wireless Hand-held Dynamometer) [40]                                          | 400                                                | •        |          |          | •         |           |           |                                        |
|                                               | Hand grip strength [41]                                                                                             | 400                                                | •        |          |          | •         |           |           |                                        |
|                                               | Lung function (post-bronchodilator spirometry, whole-body plethysmography, and transfer factor for carbon monoxide) | 400                                                | •        |          |          |           |           |           |                                        |
|                                               | Peripheral arterial disease (Dopplex D900, Huntleigh Healthcare Ltd, Cardiff, UK) [42 43]                           | 400                                                | •        |          |          | •         |           |           |                                        |
|                                               | Resting cardiac echocardiography (Maastricht only)                                                                  | 200                                                | •        |          |          |           |           |           |                                        |
|                                               | Resting electrocardiogram (Maastricht only)                                                                         | 200                                                | •        |          |          |           |           |           |                                        |
|                                               | Retinal microcirculation [44] (Maastricht only)                                                                     | 200                                                | •        |          |          |           |           |           |                                        |
|                                               | Polysomnography (PSG) (Maastricht only)                                                                             | 50                                                 | •        |          |          |           |           |           |                                        |
|                                               | <b>Psychological factors</b>                                                                                        | Nijmegen Clinical Screening Instrument (NCSI) [45] | 400      | •        |          |           | •         |           |                                        |
| COPD Assessment Test (CAT) [8]                |                                                                                                                     | 400                                                | •        | •        | •        | •         |           |           | •                                      |
| Euroqol-5d-5L (EQ-5D-5L) [46]                 |                                                                                                                     | 400                                                | •        |          |          | •         |           |           |                                        |
| Hospital Anxiety Depression Scale (HADS) [47] |                                                                                                                     | 400                                                | •        | •        | •        | •         |           |           | •                                      |

|                            |                                                                                                           |     |   |  |  |   |  |  |
|----------------------------|-----------------------------------------------------------------------------------------------------------|-----|---|--|--|---|--|--|
|                            | Montreal Cognitive Assessment (MOCA) [48]                                                                 | 400 | • |  |  | • |  |  |
|                            | Qualitative experience of fatigue (KWAMOE) [49]                                                           | 400 | • |  |  | • |  |  |
|                            | Acceptance of Disease and Impairments Questionnaire (ADIQ) [50]                                           | 400 | • |  |  | • |  |  |
|                            | Fatigue-related self-efficacy (Self-Efficacy-5) [51]                                                      | 400 | • |  |  | • |  |  |
|                            | Jacobsen Fatigue Catastrophizing Scale (FCS) [52]                                                         | 400 | • |  |  | • |  |  |
|                            | Fear of Progression Questionnaire (FOPQ) [53]                                                             | 400 | • |  |  | • |  |  |
|                            | Patient Activations Measure (PAM) [54]                                                                    | 400 | • |  |  | • |  |  |
|                            | Activity Cognitions Instrument (ACI) (self-developed questionnaire)                                       | 400 | • |  |  | • |  |  |
| <b>Behavioural factors</b> | Smoking status                                                                                            | 400 | • |  |  | • |  |  |
|                            | Alcohol consumption                                                                                       | 400 | • |  |  | • |  |  |
|                            | Caffeine consumption                                                                                      | 400 | • |  |  | • |  |  |
|                            | Objectified physical activity (Actigraph GT9X Link, 3-axis activity monitor, sample frequency 30 Hz) [55] | 400 | • |  |  | • |  |  |
|                            | Pittsburgh Sleep Quality Index (PSQI) [56]                                                                | 400 | • |  |  | • |  |  |
|                            | Epworth Sleepiness Scale (ESS) [57]                                                                       | 400 | • |  |  | • |  |  |
|                            | Causal Attribution List (CAL) [58]                                                                        | 400 | • |  |  | • |  |  |
|                            | Sickness Impact Profile (SIP) [59]                                                                        | 400 | • |  |  | • |  |  |
|                            | Social Support List, Interactions and Discrepancies (SSL-I and SSL-D) [60]                                | 400 | • |  |  | • |  |  |
| <b>Systemic factors</b>    | Venous blood samples                                                                                      | 400 | • |  |  |   |  |  |

\* Non-elective hospitalizations due to an exacerbation of COPD may occur at any moment after the start of the study. Those which occur between baseline and 12 months will result in additional measurements. Those which may occur between 12 and 24 months will not result in additional measurement.

1  
2  
3 Questionnaires will be completed via RadQuest in the home-environment. RadQuest allows very  
4 simple online questionnaire completion. If, for any reason (e.g. no PC or internet connection), it is  
5 not possible to fill out the questionnaires via RadQuest, the participant will receive a paper version.  
6 Regarding the systemic factors, we will collect blood at baseline to assess systemic high sensitivity C-  
7 reactive protein (hs-CRP), interleukin-6 (IL-6), tumornecrosisfactor- $\alpha$  (TNF- $\alpha$ ), interleukin-1 $\alpha$  (IL-1 $\alpha$ ),  
8 interleukin-1 $\beta$  (IL-1 $\beta$ ), interleukin-1-RA (IL-1-RA), interleukin-10 (IL-10), fibrinogen, leukocytes,  
9 cortisol, haemoglobin, glucose, thyroid function (TSH), renal function (creatinine), sodium,  
10 potassium, calcium, magnesium, vitamin B12, vitamin 25(OH)D3, liver function (aspartate-  
11 aminotransferase (ASAT) and alanine-aminotransferase (ALAT)), N-Terminal pro-Brain Natriuretic  
12 Peptide (NT-pro-BNP), blood sediment (BSE), antinuclear antibodies (ANA) and deoxyribonucleic acid  
13 (DNA).  
14  
15  
16  
17  
18  
19  
20  
21

### 22 **SAMPLE SIZE CALCULATION**

23 A total of 260 patients is needed to detect a medium to small effect size of 0.175 between factors  
24 (218 (2 groups with or without an exacerbation) or 264 (3 groups normal, mild or severe fatigue)) and  
25 a small effect within-between factors (222 (3 groups normal, mild or severe fatigue)), with a power of  
26 90%, a significance level of 5% and an expected drop-out rate of 20%.[29] Nevertheless, as a rather  
27 large number of possible perpetuating and precipitating factors will be evaluated, it is decided to  
28 augment the sample size to 400 inclusions.  
29  
30  
31  
32  
33

34 For EMA, a sample of 60 patients with each 160 observations (5 days with 8 measurements, collected  
35 over 4 time points) ensures that the EMA analyses are adequately powered to detect differences in  
36 fatigue, based on a power of 0.8 and two-tailed significance of 0.05.[30]  
37  
38  
39  
40

### 41 **DATA MANAGEMENT AND STATISTICAL ANALYSIS**

42 Missing data of questionnaires will be minimized using RadQuest, since items cannot be skipped. In  
43 case of missing data for other variables, the likeliness of this being missing at random will be  
44 assessed. If missing data is random, we will use appropriate imputation methods.[31]  
45  
46  
47  
48  
49

50 All statistical analyses will be performed using statistics software (SPSS V.25.0 for Windows, Chicago,  
51 Illinois, USA). First, to characterize transitions over time in fatigue, we will use latent transition  
52 analysis.[32] Second, to identify the factors that precipitate and/or perpetuate fatigue in patients  
53 with COPD, mixed model analyses will be applied for continuous outcomes measures and generalized  
54 estimating equations for dichotomous outcomes measures. Third, to study the impact of  
55  
56  
57  
58  
59

1  
2  
3 exacerbation-related hospitalizations on fatigue and its perpetuating factors we will use mixed model  
4 analyses. Fourth, to better understand the extent to which baseline fatigue is related to 2-year all-  
5 cause hospitalization and mortality, Cox proportional hazard models will be applied. At last, to  
6 identify whether there are diurnal differences in fatigue and what factors are associated with these  
7 variations, we will use hierarchical linear modelling as items are nested within moments and  
8 moments are nested within individuals. The responsiveness and sensitivity of the fatigue  
9 questionnaire versus EMA data are compared with effect sizes (Cohen's d) for the component of  
10 observed change derived from model parameters. *A priori*, a two-tailed p-value of <0.05 is  
11 considered significant.  
12  
13  
14  
15  
16  
17  
18  
19

### 20 **ETHICS AND DISSEMINATION**

21 This study will be conducted according to the principles of the Declaration of Helsinki (64<sup>th</sup> WMA  
22 General Assembly, Fortaleza, Brazil, October 2013) and in accordance with the Medical Research  
23 Involving Human Subject Act (WMO). MEC United approved the study on December 22, 2017  
24 (R17.036/NL60484.100.17). The study was registered on [www.trialregister.nl](http://www.trialregister.nl) on January 8, 2018. The  
25 results will be submitted for publication in peer-reviewed journals and will be presented at  
26 (inter)national conferences.  
27  
28  
29  
30  
31  
32

### 33 **DISCUSSION**

34 The *FAntasTIGUE* study has been designed to identify the factors that perpetuate and/or precipitate  
35 moderate to severe fatigue in patients with COPD. The novel findings will hopefully further guide the  
36 development of tailored interventions, which –in turn- will help to diminish the impact on daily life of  
37 this important yet ignored symptom.  
38  
39  
40  
41  
42  
43

### 44 **STRENGTHS**

45 A major strength of the *FAntasTIGUE* study is that a wide range of possible precipitating and  
46 perpetuating factors will be tested concurrently in one model of stable patients with COPD.  
47 Moreover, the *FAntasTIGUE* study also examines the impact of an exacerbation-related  
48 hospitalization on fatigue. This way, we aim to identify relevant factors that explain variance in  
49 fatigue. Another strength of this study is the use of EMA to capture diurnal variations of fatigue in  
50 patients with COPD. In comparison with the usual web-based or paper-and-pencil questionnaires,  
51 data gathered via EMA are not subject to recall bias and provide us with a film of variations in the  
52 patient's fatigue in their natural environment rather than a snapshot. To our knowledge, this is the  
53  
54  
55  
56  
57  
58  
59  
60

1  
2  
3 first study that uses EMA to evaluate fatigue in a population of patients with COPD. The information  
4 about the diurnal variations of fatigue will further help us to tailor interventions for reducing fatigue  
5 in patients with COPD. Moreover, EMA provides us with contextual information of factors that could  
6 precipitate or perpetuate fatigue. A methodological strength of this study is the longitudinal design.  
7 It enables us to examine the association between fatigue, exacerbation-related hospitalizations and  
8 mortality. And last, the structure of the *FAntasTIGUE* consortium, including a steering committee and  
9 a patient's advisory board, allows us to improve the research capacity, to share (academic) resources,  
10 to disseminate study results and to speed up future research.  
11  
12  
13  
14  
15  
16  
17

### 18 **LIMITATIONS**

19 The present study may encounter the following limitations: *first*, despite the benefits of repeated  
20 measurements in longitudinal studies, higher drop-out rates are expected as disease progresses. This  
21 attrition could result in a biased sample, which may compromise the study's generalizability. To limit  
22 the loss to follow-up, we will minimize the burden as much as possible and keep close contact with  
23 the patients. The patient advisory board has been intimately involved in the design of the  
24 *FAntasTIGUE* project to balance patient burden and number of variables that needed to be assessed  
25 to identify the factors that perpetuate and/or precipitate moderate to severe fatigue in patients with  
26 COPD. *Second*, the current study selection is based on convenience sampling. This may cause  
27 selection bias, since participants with a lack of motivation and a higher disease burden are less likely  
28 to respond. We will try to prevent selection bias, by inviting all patients who are diagnosed with  
29 COPD either via their physician during consultation hour or via their own general practitioner. *Third*,  
30 together with the steering committee and patient advisory board the perpetuating- and precipitating  
31 factors that will be evaluated have been carefully selected. However, we still may miss other factors  
32 that potentially contribute to fatigue in COPD.  
33  
34  
35  
36  
37  
38  
39  
40  
41  
42  
43

### 44 **CLINICAL IMPLICATIONS**

45 The results of the *FAntasTIGUE* study will contribute to a better understanding of the physical,  
46 psychological, behavioural, and systemic factors that precipitate and/or perpetuate fatigue in  
47 patients with COPD when studied concurrently. Furthermore, it will give us more insight in the  
48 diurnal variations of fatigue and the impact of exacerbations on fatigue. These findings will provide  
49 further guidance for the development of fatigue-reducing and coping interventions to improve the  
50 daily functioning of patients with COPD. This will be an important first step in the management of  
51 COPD-related fatigue.  
52  
53  
54  
55  
56  
57  
58  
59  
60

## CONCLUSION

Fatigue is an important yet ignored symptom. A better understanding in the underlying factors of moderate to severe fatigue in patients with COPD, is essential for the development of personalized fatigue-related therapies. This manuscript describes the protocol of the *FAntasTIGUE* study and gives an overview of the possible strengths, weaknesses and clinical implications.

## AUTHORS' CONTRIBUTIONS

YMJG and ML are responsible for the recruitment, data collection and data analysis. JHV is the principal investigator of Radboud university medical centre, EFWM is the principal investigator of Maastricht University Medical Centre, and MAS is the project leader. Together with DJAJ, MSYT, JBPe, CB, JWMM, MAGS, and JBPr they form the *FAntasTIGUE* consortium, and are responsible for the design, recruitment, and interpretation of the results. YM and AC are members of the patient advisory board. All authors contributed to the writing of this manuscript, read and approved the final version of the manuscript.

## FUNDING STATEMENT

This project is supported by grant 4.1.16.085 of Lung Foundation Netherlands, Leusden, the Netherlands; AstraZeneca Netherlands; Boehringer Ingelheim Netherlands; and Stichting Astma Bestrijding, Amsterdam, the Netherlands.

## COMPETING INTEREST STATEMENTS

Prof. Spruit discloses receiving personal remuneration for consultancy and/or lectures from Boehringer Ingelheim, GSK, Novartis, and AstraZeneca outside the scope of this work.



## REFERENCES

- 1 Janson-Bjerklie S, Carrieri VK, Hudes M. The sensations of pulmonary dyspnea. *Nursing research* 1986;35(3):154-9.
- 2 Kapella MC, Larson JL, Patel MK, et al. Subjective fatigue, influencing variables, and consequences in chronic obstructive pulmonary disease. *Nursing research* 2006;55(1):10-7.
- 3 Stridsman C, Skar L, Hedman L, et al. Fatigue Affects Health Status and Predicts Mortality Among Subjects with COPD: Report from the Population-Based OLIN COPD Study. *Copd* 2015;12(2):199-206.
- 4 Peters JB, Heijdra YF, Daudey L, et al. Course of normal and abnormal fatigue in patients with chronic obstructive pulmonary disease, and its relationship with domains of health status. *Patient education and counseling* 2011;85(2):281-5.
- 5 Baghai-Ravary R, Quint JK, Goldring JJ, et al. Determinants and impact of fatigue in patients with chronic obstructive pulmonary disease. *Respiratory medicine* 2009;103(2):216-23.
- 6 Janssen DJ, Spruit MA, Uszko-Lencer NH, et al. Symptoms, comorbidities, and health care in advanced chronic obstructive pulmonary disease or chronic heart failure. *Journal of palliative medicine* 2011;14(6):735-43.
- 7 van der Molen T, Willemse BW, Schokker S, et al. Development, validity and responsiveness of the Clinical COPD Questionnaire. *Health and quality of life outcomes* 2003;1:13.
- 8 Jones PW, Harding G, Berry P, et al. Development and first validation of the COPD Assessment Test. *The European respiratory journal* 2009;34(3):648-54.
- 9 Spruit MA, Vercoulen JH, Sprangers MAG, et al. Fatigue in COPD: an important yet ignored symptom. *The Lancet Respiratory medicine* 2017;5(7):542-44.
- 10 Rodriguez-Roisin R. Toward a consensus definition for COPD exacerbations. *Chest* 2000;117(5 Suppl 2):398s-401s.
- 11 Inal-Ince D, Savci S, Saglam M, et al. Fatigue and multidimensional disease severity in chronic obstructive pulmonary disease. *Multidisciplinary respiratory medicine* 2010;5(3):162-7.
- 12 Lewko A, Bidgood PL, Garrod R. Evaluation of psychological and physiological predictors of fatigue in patients with COPD. *BMC pulmonary medicine* 2009;9:47.
- 13 Woo K. A pilot study to examine the relationships of dyspnoea, physical activity and fatigue in patients with chronic obstructive pulmonary disease. *Journal of clinical nursing* 2000;9(4):526-33.
- 14 Breukink SO, Strijbos JH, Koorn M, et al. Relationship between subjective fatigue and physiological variables in patients with chronic obstructive pulmonary disease. *Respiratory medicine* 1998;92(4):676-82.
- 15 Hanania NA, Mullerova H, Locantore NW, et al. Determinants of depression in the ECLIPSE chronic obstructive pulmonary disease cohort. *American journal of respiratory and critical care medicine* 2011;183(5):604-11.

- 1  
2  
3 16 Al-shair K, Kolsum U, Dockry R, et al. Biomarkers of systemic inflammation and depression and  
4 fatigue in moderate clinically stable COPD. *Respiratory research* 2011;12:3.  
5  
6 17 Kentson M, Todt K, Skargren E, et al. Factors associated with experience of fatigue, and functional  
7 limitations due to fatigue in patients with stable COPD. *Therapeutic advances in respiratory disease*  
8 2016;10(5):410-24.  
9  
10 18 From the Global Strategy for the diagnosis, management and prevention of COPD, global Initiative  
11 for Chronic Obstructive Lung Disease (GOLD) [27-10-2017]. Available from:  
12 <http://www.goldcopd.org/> accessed 27-10-2017.  
13  
14 19 Metsemakers JFM, Höppener P, Knottnerus JA, et al. Computerized health information in the  
15 Netherlands: a Registration network of family practices. *Br J Gen Pract* 1992;42:102-06.  
16  
17 20 Vercoulen JH, Swanink CM, Fennis JF, et al. Dimensional assessment of chronic fatigue syndrome.  
18 *Journal of psychosomatic research* 1994;38(5):383-92.  
19  
20 21 Beurskens AJ, Bultmann U, Kant I, et al. Fatigue among working people: validity of a questionnaire  
21 measure. *Occupational and environmental medicine* 2000;57(5):353-7.  
22  
23 22 Bultmann U, de Vries M, Beurskens AJ, et al. Measurement of prolonged fatigue in the working  
24 population: determination of a cutoff point for the checklist individual strength. *Journal of*  
25 *occupational health psychology* 2000;5(4):411-6.  
26  
27 23 Worm-Smeitink M, Gielissen M, Bloot L, et al. The assessment of fatigue: Psychometric qualities  
28 and norms for the Checklist individual strength. *Journal of psychosomatic research* 2017;98:40-46.  
29  
30 24 Repping-Wuts H, Fransen J, van Achterberg T, et al. Persistent severe fatigue in patients with  
31 rheumatoid arthritis. *Journal of clinical nursing* 2007;16(11c):377-83.  
32  
33 25 Servaes P, Gielissen MF, Verhagen S, et al. The course of severe fatigue in disease-free breast  
34 cancer patients: a longitudinal study. *Psycho-oncology* 2007;16(9):787-95.  
35  
36 26 Vercoulen JH, Daudey L, Molema J, et al. An Integral assessment framework of health status in  
37 chronic obstructive pulmonary disease (COPD). *International journal of behavioral medicine*  
38 2008;15(4):263-79.  
39  
40 27 Maes IH, Delespaul PA, Peters ML, et al. Measuring health-related quality of life by experiences:  
41 the experience sampling method. *Value in health : the journal of the International Society for*  
42 *Pharmacoeconomics and Outcomes Research* 2015;18(1):44-51.  
43  
44 28 Larson RWC, M. The experience sampling method. In H. Reis (Ed.), *New directions for naturalistic*  
45 *methods in the behavioral sciences*: San Francisco: Jossey-Bass 1983.  
46  
47 29 Faul F, Erdfelder E, Lang AG, et al. G\*Power 3: a flexible statistical power analysis program for the  
48 social, behavioral, and biomedical sciences. *Behavior research methods* 2007;39(2):175-91.  
49  
50 30 Gelman A, Hill J. *Multilevel power calculation using fake-data simulation: data analysis using*  
51 *regression and multilevel/hierarchical models*. New York: Cambridge University Press 2007.  
52  
53  
54  
55  
56  
57  
58  
59  
60

- 1  
2  
3 31 Sterne JA, White IR, Carlin JB, et al. Multiple imputation for missing data in epidemiological and  
4 clinical research: potential and pitfalls. *BMJ (Clinical research ed)* 2009;338:b2393.  
5  
6 32 Collins LM, Lanza ST. Latent class and latent transition analysis: With applications in the social,  
7 behavioral, and health sciences: John Wiley & Sons 2013.  
8  
9 33 Andrykowski MA, Aarts MJ, van de Poll-Franse LV, et al. Low socioeconomic status and mental  
10 health outcomes in colorectal cancer survivors: disadvantage? advantage?... or both? *Psycho-*  
11 *oncology* 2013;22(11):2462-9.  
12  
13 34 Charlson ME, Pompei P, Ales KL, et al. A new method of classifying prognostic comorbidity in  
14 longitudinal studies: development and validation. *Journal of chronic diseases* 1987;40(5):373-83.  
15  
16 35 Carlsson AM. Assessment of chronic pain. I. Aspects of the reliability and validity of the visual  
17 analogue scale. *Pain* 1983;16(1):87-101.  
18  
19 36 Mahler DA, Wells CK. Evaluation of clinical methods for rating dyspnea. *Chest* 1988;93(3):580-6.  
20  
21 37 Schols AM, Wouters EF, Soeters PB, et al. Body composition by bioelectrical-impedance analysis  
22 compared with deuterium dilution and skinfold anthropometry in patients with chronic obstructive  
23 pulmonary disease. *The American journal of clinical nutrition* 1991;53(2):421-4.  
24  
25 38 Holland AE, Spruit MA, Troosters T, et al. An official European Respiratory Society/American  
26 Thoracic Society technical standard: field walking tests in chronic respiratory disease. *The European*  
27 *respiratory journal* 2014;44(6):1428-46.  
28  
29 39 Bernabeu-Mora R, Medina-Mirapeix F, Llamazares-Herran E, et al. The Short Physical Performance  
30 Battery is a discriminative tool for identifying patients with COPD at risk of disability. *International*  
31 *journal of chronic obstructive pulmonary disease* 2015;10:2619-26.  
32  
33 40 Bohannon RW, Andrews AW. Interrater reliability of hand-held dynamometry. *Physical therapy*  
34 1987;67(6):931-3.  
35  
36 41 Bechtol CO. Grip test; the use of a dynamometer with adjustable handle spacings. *The Journal of*  
37 *bone and joint surgery American volume* 1954;36-a(4):820-4; passim.  
38  
39 42 Aboyans V, Criqui MH, Abraham P, et al. Measurement and interpretation of the ankle-brachial  
40 index: a scientific statement from the American Heart Association. *Circulation* 2012;126(24):2890-  
41 909.  
42  
43 43 Houben-Wilke S, Jorres RA, Bals R, et al. Peripheral Artery Disease and Its Clinical Relevance in  
44 Patients with Chronic Obstructive Pulmonary Disease in the COPD and Systemic Consequences-  
45 Comorbidities Network Study. *American journal of respiratory and critical care medicine*  
46 2017;195(2):189-97.  
47  
48 44 De Boever P, Louwies T, Provost E, et al. Fundus photography as a convenient tool to study  
49 microvascular responses to cardiovascular disease risk factors in epidemiological studies. *Journal of*  
50 *visualized experiments : JoVE* 2014(92):e51904.  
51  
52  
53  
54  
55  
56  
57  
58  
59  
60

1  
2  
3 45 Peters JB, Daudey L, Heijdra YF, et al. Development of a battery of instruments for detailed  
4 measurement of health status in patients with COPD in routine care: the Nijmegen Clinical Screening  
5 Instrument. *Quality of life research : an international journal of quality of life aspects of treatment,*  
6 *care and rehabilitation* 2009;18(7):901-12.

7  
8  
9 46 Herdman M, Gudex C, Lloyd A, et al. Development and preliminary testing of the new five-level  
10 version of EQ-5D (EQ-5D-5L). *Quality of life research : an international journal of quality of life*  
11 *aspects of treatment, care and rehabilitation* 2011;20(10):1727-36.

12  
13 47 Spinhoven P, Ormel J, Sloekers PP, et al. A validation study of the Hospital Anxiety and Depression  
14 Scale (HADS) in different groups of Dutch subjects. *Psychological medicine* 1997;27(2):363-70.

15  
16 48 Villeneuve S, Pepin V, Rahayel S, et al. Mild cognitive impairment in moderate to severe COPD: a  
17 preliminary study. *Chest* 2012;142(6):1516-23.

18  
19 49 Gielissen MF, Knoop H, Servaes P, et al. Differences in the experience of fatigue in patients and  
20 healthy controls: patients' descriptions. *Health and quality of life outcomes* 2007;5:36.

21  
22 50 Boer LM, Daudey L, Peters JB, et al. Assessing the stages of the grieving process in chronic  
23 obstructive pulmonary disease (COPD): validation of the Acceptance of Disease and Impairments  
24 Questionnaire (ADIQ). *International journal of behavioral medicine* 2014;21(3):561-70.

25  
26 51 Vercoulen JH, Swanink CM, Galama JM, et al. The persistence of fatigue in chronic fatigue  
27 syndrome and multiple sclerosis: development of a model. *Journal of psychosomatic research*  
28 1998;45(6):507-17.

29  
30 52 Jacobsen PB, Andrykowski MA, Thors CL. Relationship of catastrophizing to fatigue among women  
31 receiving treatment for breast cancer. *Journal of consulting and clinical psychology* 2004;72(2):355-  
32 61.

33  
34 53 Kwakkenbos L, van den Hoogen FH, Custers J, et al. Validity of the Fear of Progression  
35 Questionnaire-Short Form in patients with systemic sclerosis. *Arthritis care & research*  
36 2012;64(6):930-4.

37  
38 54 Hibbard JH, Mahoney ER, Stockard J, et al. Development and testing of a short form of the patient  
39 activation measure. *Health services research* 2005;40(6 Pt 1):1918-30.

40  
41 55 Rabinovich RA, Louvaris Z, Raste Y, et al. Validity of physical activity monitors during daily life in  
42 patients with COPD. *The European respiratory journal* 2013;42(5):1205-15.

43  
44 56 Buysse DJ, Reynolds CF, 3rd, Monk TH, et al. The Pittsburgh Sleep Quality Index: a new instrument  
45 for psychiatric practice and research. *Psychiatry research* 1989;28(2):193-213.

46  
47 57 Johns MW. A new method for measuring daytime sleepiness: the Epworth sleepiness scale. *Sleep*  
48 1991;14(6):540-5.

1  
2  
3 58 Servaes P, Verhagen S, Bleijenberg G. Determinants of chronic fatigue in disease-free breast  
4 cancer patients: a cross-sectional study. *Annals of oncology : official journal of the European Society*  
5 *for Medical Oncology* 2002;13(4):589-98.  
6

7 59 Bergner M, Bobbitt RA, Carter WB, et al. The Sickness Impact Profile: development and final  
8 revision of a health status measure. *Medical care* 1981;19(8):787-805.  
9

10 60 Sonderen E. Het meten van sociale steun met de Sociale Steun Lijst-Interacties (SSLI-I) en de  
11 Sociale Steun Lijst-Discrepancies (SSL-D), een handleiding [Assessing social support with the Social  
12 Support List-Interactions (SSL-I) and the social support list-discrepancies, a manual]. . *Noordelijk*  
13 *Centrum voor Gezondheidsvraagstukken* 1993  
14  
15  
16

## 17 18 **FIGURE LEGENDS**

19 *Figure 1 Timeline: measurements will be performed at baseline, and at months 4, 8 and 12. Additional measurements will be*  
20 *carried out when a non-elective, exacerbation-related hospitalization occurs. Patients will be followed-up at month 18 and*  
21 *24.*  
22  
23  
24  
25  
26  
27  
28  
29  
30  
31  
32  
33  
34  
35  
36  
37  
38  
39  
40  
41  
42  
43  
44  
45  
46  
47  
48  
49  
50  
51  
52  
53  
54  
55  
56  
57  
58  
59  
60

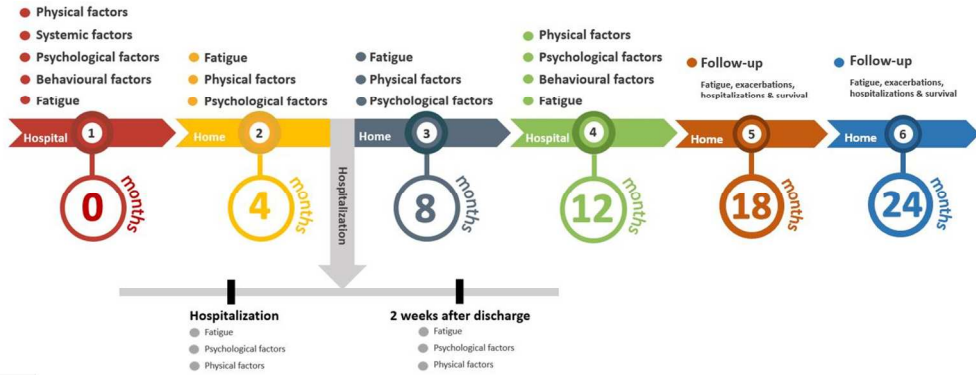

Figure 1 Timeline: measurements will be performed at baseline, and at months 4, 8 and 12. Additional measurements will be carried out when a non-elective, exacerbation-related hospitalization occurs. Patients will be followed-up at month 18 and 24.

114x43mm (300 x 300 DPI)

Peer review only

# BMJ Open

## Fatigue in patients with Chronic Obstructive Pulmonary Disease: protocol of the Dutch multicentre, longitudinal, observational *FANTASTIGUE* study

|                                 |                                                                                                                                                                                                                                                                                                                                                                                                                                                                                                                                                                                                                                                                                                                                                                                                                                                                                                                                                                                                                                                                                                                                                                                                                                                                                                                                                                                                                                                                                                                                                                                                                                                                                                                                                                                                                                                                                                                                                                                                                                                                                                            |
|---------------------------------|------------------------------------------------------------------------------------------------------------------------------------------------------------------------------------------------------------------------------------------------------------------------------------------------------------------------------------------------------------------------------------------------------------------------------------------------------------------------------------------------------------------------------------------------------------------------------------------------------------------------------------------------------------------------------------------------------------------------------------------------------------------------------------------------------------------------------------------------------------------------------------------------------------------------------------------------------------------------------------------------------------------------------------------------------------------------------------------------------------------------------------------------------------------------------------------------------------------------------------------------------------------------------------------------------------------------------------------------------------------------------------------------------------------------------------------------------------------------------------------------------------------------------------------------------------------------------------------------------------------------------------------------------------------------------------------------------------------------------------------------------------------------------------------------------------------------------------------------------------------------------------------------------------------------------------------------------------------------------------------------------------------------------------------------------------------------------------------------------------|
| Journal:                        | <i>BMJ Open</i>                                                                                                                                                                                                                                                                                                                                                                                                                                                                                                                                                                                                                                                                                                                                                                                                                                                                                                                                                                                                                                                                                                                                                                                                                                                                                                                                                                                                                                                                                                                                                                                                                                                                                                                                                                                                                                                                                                                                                                                                                                                                                            |
| Manuscript ID                   | bmjopen-2018-021745.R1                                                                                                                                                                                                                                                                                                                                                                                                                                                                                                                                                                                                                                                                                                                                                                                                                                                                                                                                                                                                                                                                                                                                                                                                                                                                                                                                                                                                                                                                                                                                                                                                                                                                                                                                                                                                                                                                                                                                                                                                                                                                                     |
| Article Type:                   | Protocol                                                                                                                                                                                                                                                                                                                                                                                                                                                                                                                                                                                                                                                                                                                                                                                                                                                                                                                                                                                                                                                                                                                                                                                                                                                                                                                                                                                                                                                                                                                                                                                                                                                                                                                                                                                                                                                                                                                                                                                                                                                                                                   |
| Date Submitted by the Author:   | 09-Mar-2018                                                                                                                                                                                                                                                                                                                                                                                                                                                                                                                                                                                                                                                                                                                                                                                                                                                                                                                                                                                                                                                                                                                                                                                                                                                                                                                                                                                                                                                                                                                                                                                                                                                                                                                                                                                                                                                                                                                                                                                                                                                                                                |
| Complete List of Authors:       | <p>Goërtz, Yvonne; Centro of Expertise for Chronic Organ Failure, Department of Research and Education<br/> Looijmans, Milou; Radboud University Nijmegen Medical Centre, Department of Medical Psychology and Department of Pulmonary Diseases<br/> Prins, Judith; Radboud University Nijmegen Medical Centre, Department of Medical Psychology and Department of Pulmonary Diseases<br/> Janssen, Daisy; Centro of Expertise for Chronic Organ Failure, Department of Research and Education; Maastricht University Medical Centre, Centro of Expertise for Palliative Care<br/> Thong, Melissa S. Y.; Academic Medical Centre University of Amsterdam, Amsterdam Public Health Research Institute, Department of Medical Psychology<br/> Peters, Jeannette; Radboud University Nijmegen Medical Centre, Department of Medical Psychology and Department of Pulmonary Diseases<br/> Burtin, Chris ; Hasselt University, Faculty of Medicine and Life Sciences, REVAL - Rehabilitation Research Center, BIOMED- Biomedical Research Institute<br/> Meertens-Kerris, Yvonne; Centro of Expertise for Chronic Organ Failure, Member of the Patient Advisory Board<br/> Coors, Arnold; Radboud University Nijmegen Medical Centre, Member of the Patient Advisory Board<br/> Muris, Jean; Maastricht University, CAPHRI Care and Public Health Research Institute, Department of Family Medicine<br/> Sprangers, Mirjam; Academic Medical Centre University of Amsterdam, Amsterdam Public Health Research Institute, Department of Medical Psychology<br/> Wouters, Emiel; Centro of Expertise for Chronic Organ Failure, Research and Education; Maastricht University Medical Centre, Department of Respiratory Medicine<br/> Vercoulen, Jan; Radboud University Nijmegen Medical Centre, Department of Medical Psychology and Department of Pulmonary Diseases<br/> Spruit, Martijn; Centro of Expertise for Chronic Organ Failure, Research and Education; Hasselt University, Faculty of Medicine and Life Sciences, REVAL - Rehabilitation Research Center, BIOMED- Biomedical Research Institute</p> |
| <b>Primary Subject Heading</b>: | Respiratory medicine                                                                                                                                                                                                                                                                                                                                                                                                                                                                                                                                                                                                                                                                                                                                                                                                                                                                                                                                                                                                                                                                                                                                                                                                                                                                                                                                                                                                                                                                                                                                                                                                                                                                                                                                                                                                                                                                                                                                                                                                                                                                                       |
| Secondary Subject Heading:      | Respiratory medicine                                                                                                                                                                                                                                                                                                                                                                                                                                                                                                                                                                                                                                                                                                                                                                                                                                                                                                                                                                                                                                                                                                                                                                                                                                                                                                                                                                                                                                                                                                                                                                                                                                                                                                                                                                                                                                                                                                                                                                                                                                                                                       |

1  
2  
3  
4  
5  
6  
7  
8  
9  
10  
11  
12  
13  
14  
15  
16  
17  
18  
19  
20  
21  
22  
23  
24  
25  
26  
27  
28  
29  
30  
31  
32  
33  
34  
35  
36  
37  
38  
39  
40  
41  
42  
43  
44  
45  
46  
47  
48  
49  
50  
51  
52  
53  
54  
55  
56  
57  
58  
59  
60

|           |                                                                    |
|-----------|--------------------------------------------------------------------|
| Keywords: | Chronic Obstructive Pulmonary Disease, Fatigue, Underlying factors |
|           |                                                                    |

SCHOLARONE™  
Manuscripts

For peer review only



**TITLE**

Fatigue in patients with Chronic Obstructive Pulmonary Disease: protocol of the Dutch multicentre, longitudinal, observational *FAntasTIGUE* study

**AUTHORS:**

Yvonne M.J. Goërtz\*<sup>1</sup>, Milou Looijmans\*<sup>2</sup>, Judith B. Prins<sup>2</sup>, Daisy J.A. Janssen<sup>1,3</sup>, Melissa S.Y. Thong<sup>4</sup>, Jeannette B. Peters<sup>2</sup>, Chris Burtin<sup>5</sup>, Yvonne Meertens-Kerris<sup>6</sup>, Arnold Coors<sup>7</sup>, Jean W.M. Muris<sup>8</sup>, Mirjam A.G. Sprangers<sup>4</sup>, Emiel F.M. Wouters<sup>1,9</sup>, Jan H. Vercoulen<sup>2</sup>, Martijn A. Spruit<sup>1,5,9,10</sup>

\*shared first authors

**AFFILIATIONS:**

<sup>1</sup>Department of Research and Education, Ciro, Centre of Expertise for Chronic Organ Failure, Horn, The Netherlands.

<sup>2</sup> Department of Medical Psychology and Department of Pulmonary Diseases, Radboud University Nijmegen Medical Centre, Nijmegen, The Netherlands.

<sup>3</sup>Centre of Expertise for Palliative Care, Maastricht University Medical Centre (MUMC+), Maastricht, The Netherlands.

<sup>4</sup> Department of Medical Psychology, Amsterdam Public Health Research Institute, Academic Medical Centre University of Amsterdam, Amsterdam, The Netherlands.

<sup>5</sup>REVAL - Rehabilitation Research Center, BIOMED - Biomedical Research Institute, Faculty of Medicine and Life Sciences, Hasselt University, Diepenbeek, Belgium.

<sup>6</sup> Member of the Patient Advisory Board, Ciro, Centre of Expertise for Chronic Organ Failure, Horn, the Netherlands.

<sup>7</sup> Member of the Patient Advisory Board, Radboud University Nijmegen Medical Centre, Nijmegen, the Netherlands.

<sup>8</sup> Department of Family Medicine, CAPHRI Care and Public Health Research Institute, Maastricht University, Maastricht, The Netherlands.

<sup>9</sup>Department of Respiratory Medicine, Maastricht University Medical Centre (MUMC+), Maastricht, The Netherlands.

<sup>10</sup> NUTRIM School of Nutrition and Translational Research in Metabolism, Maastricht, Netherlands.

**CORRESPONDENCE TO:**

Full name: Yvonne M.J. Goërtz

Postal address: Ciro, Center of Expertise for Chronic Organ Failure, Department of Research and Education, 6085 NM Horn, The Netherlands

1  
2  
3 Mail: [yvonnegoertz@ciro-horn.nl](mailto:yvonnegoertz@ciro-horn.nl)

4 Tel.:(0)475 587 602  
5  
6  
7

8 **WORD COUNT: 2971**

9 **WORD COUNT ABSTRACT: 298**  
10  
11  
12  
13

## 14 **ABSTRACT**

15 *Introduction:* Fatigue is the second most common symptom in patients with Chronic Obstructive  
16 Pulmonary Disease (COPD). Despite its high prevalence, fatigue is often ignored in daily practice. For  
17 this reason, little is known about the underlying determinants of fatigue in patients with COPD. The  
18 primary objectives of this study are to chart the course of fatigue in patients with COPD, to identify  
19 the physical, systemic, psychological, and behavioural factors that precipitate and perpetuate fatigue  
20 in patients with COPD, to evaluate the impact of exacerbation-related hospitalizations on fatigue,  
21 and to better understand the association between fatigue and 2-year all-cause hospitalization and  
22 mortality in patients with COPD. The secondary aim is to identify diurnal differences in fatigue by  
23 using Ecological Momentary Assessment (EMA). This manuscript describes the protocol of the  
24 *FAntasTIGUE* study and gives an overview of the possible strengths, weaknesses and clinical  
25 implications.  
26  
27

28 *Methods and analysis:* A two-year longitudinal, observational study, enrolling 400 patients with  
29 clinically stable COPD has been designed. Fatigue, the primary outcome, will be measured by the  
30 subjective fatigue subscale of the Checklist Individual Strength (CIS-Fatigue). The secondary outcome  
31 is the day-to-day/diurnal fatigue, registered in a subsample (n=60) by EMA. CIS-Fatigue and EMA will  
32 be evaluated at baseline, and at 4, 8 and 12 months. The precipitating and perpetuating factors of  
33 fatigue (physical, psychological, behavioural, and systemic), will be assessed at baseline and at 12  
34 months. Additional assessments will be conducted following hospitalization due to an exacerbation  
35 of COPD that occurs between baseline and 12 months. Finally, at 18 and 24 months the participants  
36 will be followed-up on their fatigue, number of exacerbations, exacerbation-related hospitalization,  
37 and survival.  
38  
39

40 *Ethics and dissemination:* This protocol was approved by the Medical research Ethics Committees  
41 United (MEC-U), Nieuwegein, the Netherlands (NL60484.100.17). It has been registered at the Dutch  
42 Trial Register (NTR6933).  
43  
44  
45  
46  
47  
48  
49  
50  
51  
52  
53  
54  
55  
56  
57  
58  
59  
60

## STRENGTHS AND LIMITATIONS OF THIS STUDY

- The present study is a large, longitudinal, multicenter study evaluating a wide range of possible precipitating and perpetuating factors of mild to severe fatigue in patients with COPD.
- The Ecological Momentary Assessment data will give us more insight in the diurnal variations of fatigue.
- The longitudinal design enables to examine the association between fatigue, exacerbation-related hospitalizations and mortality and allows us to investigate whether the associations between fatigue and the explaining factors are temporarily or fluctuate over time.
- The perpetuating- and precipitating factors have been carefully selected, it is –however- possible that there are other factors that contribute to fatigue in COPD that will be missed.

## INTRODUCTION

Fatigue, the subjective feeling of tiredness or exhaustion, is next to dyspnoea the most common and distressing symptom in patients with Chronic Obstructive Pulmonary Disease (COPD).[1] It affects the ability to perform activities of daily living and impacts the patient's quality of life (QoL).[2, 3] Among patients with stable moderate to severe COPD, around fifty percent experiences mild to severe fatigue,[4] which is significantly higher compared to elderly, non-COPD subjects.[5] Nevertheless, despite its high prevalence and significant negative health consequences, fatigue remains often undiagnosed and, in turn, untreated.[6] This might be due to the underrepresentation of fatigue questions in commonly used health status assessment tools.[7, 8] Moreover, relatively few studies have focused on the symptom fatigue and, therefore, little is known about the precipitating and perpetuating factors of mild to severe fatigue in patients with COPD. Consequently, specific interventions aimed at reducing COPD-related fatigue are lacking. A better insight into the underlying determinants, will provide guidance for the development of personalized interventions for this important yet disregarded symptom in patients with COPD.[9]

Multiple precipitating factors are expected to play a role in the cause of COPD-related fatigue.[9] It has been suggested that COPD-specific features are associated with fatigue, since the prevalence of fatigue is higher in patients with COPD compared to elderly control subjects.[5] However, evidence suggests that fatigue is not related to the degree of airflow limitation.[4] This indicates that the degree of airflow limitation may not be the primary underlying cause of mild to severe fatigue in patients with COPD. On the other hand, a COPD exacerbation precipitates mild to severe fatigue.[5, 10] However, the size of the impact of an exacerbation-related hospitalization on fatigue remains to be clarified.

Next to precipitating factors, various physical, systemic, psychological, and behavioural factors are assumed to perpetuate mild to severe fatigue in patients with COPD. Generally, studies report significant, weak-to-moderate associations between fatigue and health status, exercise performance, physical activity, functional impairments, sleep quality, symptoms of anxiety or depression, and mood status.[2, 5, 11-15] Moreover, research indicates that COPD is associated with low-grade systemic inflammation.[16] Nonetheless, whether and to what extent low-grade systemic inflammation is related to fatigue needs to be further explored.

Thus, fatigue in COPD is a complex symptom, due to a combination of precipitating and perpetuating factors. To date, the abovementioned factors have rarely been assessed comprehensively in one

1  
2  
3 study in patients with COPD.[17] Moreover, the role of sleep apnoea, comorbidities, medication, and  
4 exacerbation-related hospitalizations are unknown. Therefore, we have designed a longitudinal,  
5 observational study, which evaluates a wide range of possible underlying factors of mild to severe  
6 fatigue in patients with COPD. This manuscript describes the protocol of the *FAntasTIGUE* study and  
7 gives an overview of its possible strengths, weaknesses and clinical implications.  
8  
9  
10

### 11 *Objectives of this study*

12 The primary objectives of the *FAntasTIGUE* study are:

- 13 1.1 To chart the course of fatigue in patients with COPD.
- 14 1.2 To identify physical, systemic, psychological, and behavioural factors that precipitate and/or  
15 perpetuate fatigue in patients with COPD.
- 16 1.3 To identify the impact of exacerbation-related hospitalizations on fatigue and its  
17 perpetuating factors.
- 18 1.4 To better understand the association between baseline fatigue and 2-year all-cause  
19 hospitalization and mortality in patients with COPD.

20 The secondary objective of this study is:

- 21 2. To identify diurnal differences in fatigue by augmenting traditional questionnaire data with  
22 Ecological Momentary Assessment (EMA).

## 23 **METHODS**

24 The *FAntasTIGUE* study is a collaboration between CIRO (Horn, The Netherlands), Radboud  
25 university medical centre (Nijmegen, The Netherlands), Academic Medical Centre (Amsterdam, The  
26 Netherlands), Maastricht University Medical Centre (Maastricht, The Netherlands), and Hasselt  
27 University (Diepenbeek, Belgium). The consortium consists of members from various disciplines and  
28 backgrounds (e.g. chest physicians, clinical psychologists, an elderly care specialist, a cardiologist, a  
29 general practitioner, and researchers), to ensure necessary know-how to enable the successful  
30 completion of the project. Moreover, a patient advisory board is closely involved to advice and  
31 monitor the *FAntasTIGUE* project, by providing valuable insight from the patient perspective.  
32  
33  
34  
35

### 36 **PATIENT AND PUBLIC INVOLVEMENT**

37 Based on the input of patients with chronic lung disease, fatigue was prioritized as a research topic  
38 during the Netherlands Respiratory Society (NRS) meeting  
39  
40  
41  
42  
43  
44  
45  
46  
47  
48  
49  
50  
51

1  
2  
3 ([www.nationaalprogrammaalongonderzoek.nl](http://www.nationaalprogrammaalongonderzoek.nl)).[18] As stated, patient representatives are full  
4 members of the *FAntasTIGUE* consortium, and have an active role in the decision process. The  
5 patient advisory board has been involved in setting up the proposal, in reviewing the study design  
6 before submission to the ethical committee, and in discussing the schedules of assessment. After  
7 completion of the study, the patient advisory board will also be asked to be involved in the  
8 development of post-trial communication.  
9  
10  
11  
12  
13  
14

### 15 **STUDY DESIGN**

16 A two-year longitudinal, observational study, enrolling patients with clinically stable COPD has been  
17 designed (Figure 1). The assessments at baseline, 12 months, and during the first four days of a  
18 possible exacerbation-related hospitalization will be performed in a hospital setting. The remaining  
19 measurements at 4, 8, 18, and 24 months will take place at the patients' homes.  
20  
21  
22  
23

24 The primary outcome fatigue severity will be assessed with a questionnaire at baseline, and at 4, 8,  
25 12, 18 and 24 months, as well as during exacerbation-related hospitalizations and two weeks after  
26 discharge. The secondary outcome, day-to-day/diurnal variation in fatigue, will be registered using  
27 Ecological Momentary Assessment (EMA) in a subsample (n=60) at baseline, and at 4, 8 and 12  
28 months. Selection is based on convenient sampling, a "first-come, first-serve" approach. The  
29 precipitating and perpetuating factors of mild to severe fatigue in patients with COPD (physical,  
30 psychological, behavioural, and systemic factors), will be assessed at baseline and at 12 months.  
31 Also, when patients are admitted to the hospital between baseline and 12 months due to an  
32 exacerbation of COPD, some tests will be repeated during the first four days of hospitalization, and  
33 two weeks after discharge. At last, at 18 and 24 months the participants will be followed-up on their  
34 fatigue, number of exacerbations, exacerbation-related hospitalizations and survival.  
35  
36  
37  
38  
39  
40  
41  
42

### 43 **ELIGIBILITY CRITERIA**

44 To be eligible, a subject must meet the following criteria:  
45

- 46 1. A diagnosis of COPD according to the Global Strategy for the Diagnosis, Management, and  
47 Prevention of COPD (GOLD, grade 1A to 4D), with a post-bronchodilator forced expiratory  
48 volume in 1 second (FEV<sub>1</sub>) to forced vital capacity (FVC) ratio, FEV<sub>1</sub>/FVC < 0.7;[19]
- 49 2. No exacerbation-related hospitalization less than 4 weeks preceding enrolment;
- 50 3. No use of oral corticosteroids and/or antibiotics less than 4 weeks preceding enrolment;
- 51 4. Provided written informed consent.  
52  
53  
54  
55  
56  
57  
58  
59  
60

1  
2  
3 Patients lacking a sufficient understanding of the Dutch language and/or participating in concurrent  
4 intervention studies will be excluded. There are no age or smoking status restrictions, as well as no  
5 exclusion based on comorbidities or the use of long term oxygen therapy.  
6  
7

8  
9 Extra eligibility criteria for the EMA sub-study are:

- 10 1. Access to the internet at home (Wi-Fi);
- 11 2. Able to operate a smartphone/iPod.
- 12
- 13
- 14

## 15 **RECRUITMENT**

16 Participants will be recruited at the outpatient clinics of the Department of Respiratory Medicine in  
17 Maastricht and the Department of Pulmonary Diseases in Nijmegen, and from the registration  
18 Network of Family Practices (RNH) of Maastricht University.[20] Eligible patients from the outpatient  
19 clinics will be informed about the research by their physician during their pulmonary consultation  
20 and are asked if the investigator may contact them to provide detailed information. Patients  
21 recruited via the RNH network will receive a letter on behalf of their general practitioner introducing  
22 the research project. In case the patient agrees to participate, an appointment for the baseline  
23 assessment at the hospital will be made. Written informed consent will be obtained at the beginning  
24 of this visit.  
25  
26  
27  
28  
29  
30  
31

## 32 **OUTCOMES**

### 33 *Primary outcome*

34 Fatigue severity will be measured by the subjective fatigue subscale of the Checklist Individual  
35 Strength (CIS-Fatigue).[21] The CIS-Fatigue consists of eight items scored on a seven-point Likert  
36 scale. The scores range from 8 (normal fatigue) to 56 (most severe fatigue). A score of 26 or lower  
37 indicates normal fatigue, scores between 27 to 35 indicate mild fatigue and a score of 36 or higher  
38 indicates severe fatigue. The CIS-Fatigue is a standardized and validated questionnaire that has been  
39 used in healthy subjects,[22-24] and among various patient populations including COPD.[21, 25-27]  
40 The CIS-Fatigue will be administered at baseline, and at 4, 8, 12, 18 and 24 months, as well as during  
41 exacerbation-related hospitalizations and two weeks after discharge.  
42  
43  
44  
45  
46  
47  
48  
49

### 50 *Secondary outcome*

51 Day-to-day/diurnal variations of fatigue will be measured in a subsample (n=60) with Ecological  
52 Momentary Assessment (EMA).[28, 29] EMA involves repeated measurements of the participant's  
53 behaviour and context in vivo and in real time. In the current study, the participants will be given an  
54 iPod for the duration of the study with the EMA application ([www.psymate.eu](http://www.psymate.eu)) installed. The  
55  
56  
57  
58  
59  
60

1  
2  
3 participants will be prompted to answer questions about their fatigue, context and surroundings, 8  
4 times per day at random moments between 7:30 a.m. and 10:30 p.m. for 5 consecutive days at  
5 baseline, and at 4, 8 and 12 months. Patients will be given instructions to carry the device with them  
6 at all times for 5 consecutive days. Furthermore, they will be requested to fill out the questions  
7 immediately after the alert and to keep a normal day/night routine.  
8  
9

### 10 11 12 *Explanatory factors*

13 Table 1 provides an overview of the precipitating and perpetuating factors of mild to severe fatigue  
14 that will be assessed at baseline, and at months 4, 8, 12, 18 and 24, as well as during non-elective,  
15 exacerbation-related hospitalizations and two weeks after discharge.  
16  
17  
18  
19  
20  
21  
22  
23  
24  
25  
26  
27  
28  
29  
30  
31  
32  
33  
34  
35  
36  
37  
38  
39  
40  
41  
42  
43  
44  
45  
46  
47  
48  
49  
50  
51  
52  
53  
54  
55  
56  
57  
58  
59  
60



Table 1 Overview outcome measurements

|                                               |                                                                                                                     | Number (n)                                         | 0 months | 4 months | 8 months | 12 months | 18 months | 24 months | Exacerbation-related hospitalizations* |
|-----------------------------------------------|---------------------------------------------------------------------------------------------------------------------|----------------------------------------------------|----------|----------|----------|-----------|-----------|-----------|----------------------------------------|
| <b>Fatigue</b>                                | Subjective fatigue subscale of the Checklist Individual Strength (CIS-Fatigue) [21]                                 | 400                                                | •        | •        | •        | •         | •         | •         | •                                      |
|                                               | Ecological Momentary Assessment (EMA) [28, 29]                                                                      | 60                                                 | •        | •        | •        | •         |           |           |                                        |
| <b>Socio-demographic factors</b>              | Gender                                                                                                              | 400                                                | •        |          |          |           |           |           |                                        |
|                                               | Age                                                                                                                 | 400                                                | •        |          |          |           |           |           |                                        |
|                                               | Social-economic status (SES) [30]                                                                                   | 400                                                | •        |          |          |           |           |           |                                        |
|                                               | Marital status                                                                                                      | 400                                                | •        |          |          | •         |           |           |                                        |
|                                               | Survival status                                                                                                     | 400                                                | •        | •        | •        | •         | •         | •         |                                        |
| <b>Physical factors</b>                       | Current medication                                                                                                  | 400                                                | •        |          |          | •         |           |           |                                        |
|                                               | Charlson Comorbidity Index (CCI) [31]                                                                               | 400                                                | •        |          |          | •         |           |           |                                        |
|                                               | Symptoms checklist [32]                                                                                             | 400                                                | •        |          |          | •         |           |           |                                        |
|                                               | mMRC dyspnoea scale [33]                                                                                            | 400                                                | •        | •        | •        | •         |           |           | •                                      |
|                                               | Exacerbations last 4 or 6 months (as appropriate)                                                                   | 400                                                | •        | •        | •        | •         | •         | •         |                                        |
|                                               | All-cause hospitalizations                                                                                          | 400                                                | •        | •        | •        | •         | •         | •         |                                        |
|                                               | Body Mass Index (BMI)                                                                                               | 400                                                | •        |          |          | •         |           |           |                                        |
|                                               | Waist circumference                                                                                                 | 400                                                | •        |          |          | •         |           |           |                                        |
|                                               | Bioelectrical impedance analyses [34]                                                                               | 400                                                | •        |          |          | •         |           |           |                                        |
|                                               | 6 Minute Walk Test (6MWT) [35]                                                                                      | 400                                                | •        |          |          | •         |           |           |                                        |
|                                               | Short Physical Performance Battery (SPPB) [36]                                                                      | 400                                                | •        |          |          | •         |           |           |                                        |
|                                               | Lower-limb muscle function (MicroFet2 Wireless Hand-held Dynamometer) [37]                                          | 400                                                | •        |          |          | •         |           |           |                                        |
|                                               | Hand grip strength [38]                                                                                             | 400                                                | •        |          |          | •         |           |           |                                        |
|                                               | Lung function (post-bronchodilator spirometry, whole-body plethysmography, and transfer factor for carbon monoxide) | 400                                                | •        |          |          |           |           |           |                                        |
|                                               | Peripheral arterial disease (Dopplex D900, Huntleigh Healthcare Ltd, Cardiff, UK) [39, 40]                          | 400                                                | •        |          |          | •         |           |           |                                        |
|                                               | Resting cardiac echocardiography (Maastricht only)                                                                  | 200                                                | •        |          |          |           |           |           |                                        |
|                                               | Resting electrocardiogram (Maastricht only)                                                                         | 200                                                | •        |          |          |           |           |           |                                        |
|                                               | Retinal microcirculation [41] (Maastricht only)                                                                     | 200                                                | •        |          |          |           |           |           |                                        |
|                                               | Polysomnography (PSG) (Maastricht only)                                                                             | 50                                                 | •        |          |          |           |           |           |                                        |
|                                               | <b>Psychological factors</b>                                                                                        | Nijmegen Clinical Screening Instrument (NCSI) [42] | 400      | •        |          |           | •         |           |                                        |
| COPD Assessment Test (CAT) [8]                |                                                                                                                     | 400                                                | •        | •        | •        | •         |           |           | •                                      |
| Euroqol-5d-5L (EQ-5D-5L) [43]                 |                                                                                                                     | 400                                                | •        |          |          | •         |           |           |                                        |
| Hospital Anxiety Depression Scale (HADS) [44] |                                                                                                                     | 400                                                | •        | •        | •        | •         |           |           | •                                      |

1  
2  
3  
4  
5  
6  
7  
8  
9  
10  
11  
12  
13  
14  
15  
16  
17  
18  
19  
20  
21  
22  
23  
24  
25  
26  
27  
28  
29  
30  
31  
32  
33  
34  
35  
36  
37  
38  
39  
40  
41  
42  
43  
44  
45  
46  
47

|                            |                                                                                                           |     |   |  |  |   |  |  |
|----------------------------|-----------------------------------------------------------------------------------------------------------|-----|---|--|--|---|--|--|
|                            | Montreal Cognitive Assessment (MOCA) [45]                                                                 | 400 | • |  |  | • |  |  |
|                            | Qualitative experience of fatigue (KWAMOE) [46]                                                           | 400 | • |  |  | • |  |  |
|                            | Acceptance of Disease and Impairments Questionnaire (ADIQ) [47]                                           | 400 | • |  |  | • |  |  |
|                            | Fatigue-related self-efficacy (Self-Efficacy-5) [48]                                                      | 400 | • |  |  | • |  |  |
|                            | Jacobsen Fatigue Catastrophizing Scale (FCS) [49]                                                         | 400 | • |  |  | • |  |  |
|                            | Fear of Progression Questionnaire (FOPQ) [50]                                                             | 400 | • |  |  | • |  |  |
|                            | Patient Activations Measure (PAM) [51]                                                                    | 400 | • |  |  | • |  |  |
|                            | Activity Cognitions Instrument (ACI) (self-developed questionnaire)                                       | 400 | • |  |  | • |  |  |
| <b>Behavioural factors</b> | Smoking status                                                                                            | 400 | • |  |  | • |  |  |
|                            | Alcohol consumption                                                                                       | 400 | • |  |  | • |  |  |
|                            | Caffeine consumption                                                                                      | 400 | • |  |  | • |  |  |
|                            | Objectified physical activity (Actigraph GT9X Link, 3-axis activity monitor, sample frequency 30 Hz) [52] | 400 | • |  |  | • |  |  |
|                            | Pittsburgh Sleep Quality Index (PSQI) [53]                                                                | 400 | • |  |  | • |  |  |
|                            | Epworth Sleepiness Scale (ESS) [54]                                                                       | 400 | • |  |  | • |  |  |
|                            | Causal Attribution List (CAL) [55]                                                                        | 400 | • |  |  | • |  |  |
|                            | Sickness Impact Profile (SIP) [56]                                                                        | 400 | • |  |  | • |  |  |
|                            | Social Support List, Interactions and Discrepancies (SSL-I and SSL-D) [57]                                | 400 | • |  |  | • |  |  |
| <b>Systemic factors</b>    | Venous blood samples                                                                                      | 400 | • |  |  |   |  |  |

\* Non-elective hospitalizations due to an exacerbation of COPD may occur at any moment after the start of the study. Those which occur between baseline and 12 months will result in additional measurements. Those which may occur between 12 and 24 months will not result in additional measurement.

1  
2  
3 Questionnaires will be completed via RadQuest in the home-environment. RadQuest allows very  
4 simple online questionnaire completion. If, for any reason (e.g. no PC or internet connection), it is  
5 not possible to fill out the questionnaires via RadQuest, the participant will receive a paper version.  
6 Regarding the systemic factors, we will collect blood at baseline to assess systemic high sensitivity C-  
7 reactive protein (hs-CRP), interleukin-6 (IL-6), tumornecrosisfactor- $\alpha$  (TNF- $\alpha$ ), interleukin-1 $\alpha$  (IL-1 $\alpha$ ),  
8 interleukin-1 $\beta$  (IL-1 $\beta$ ), interleukin-1-RA (IL-1-RA), interleukin-10 (IL-10), fibrinogen, leukocytes,  
9 cortisol, haemoglobin, glucose, thyroid function (TSH), renal function (creatinine), sodium,  
10 potassium, calcium, magnesium, vitamin B12, vitamin 25(OH)D3, liver function (aspartate-  
11 aminotransferase (ASAT) and alanine-aminotransferase (ALAT)), N-Terminal pro-Brain Natriuretic  
12 Peptide (NT-pro-BNP), blood sediment (BSE), antinuclear antibodies (ANA) and deoxyribonucleic acid  
13 (DNA).  
14  
15  
16  
17  
18  
19  
20  
21

### 22 **SAMPLE SIZE CALCULATION**

23 A total of 260 patients is needed to detect a medium to small effect size of 0.175 between factors  
24 (218 (2 groups with or without an exacerbation) or 264 (3 groups normal, mild or severe fatigue)) and  
25 a small effect within-between factors (222 (3 groups normal, mild or severe fatigue)), with a power of  
26 90%, a significance level of 5% and an expected drop-out rate of 20%.[58] Nevertheless, as a rather  
27 large number of possible perpetuating and precipitating factors will be evaluated, it is decided to  
28 augment the sample size to 400 inclusions.  
29  
30  
31  
32  
33

34 For EMA, a sample of 60 patients with each 160 observations (5 days with 8 measurements, collected  
35 over 4 time points) ensures that the EMA analyses are adequately powered to detect differences in  
36 fatigue, based on a power of 0.8 and two-tailed significance of 0.05.[59]  
37  
38  
39  
40

### 41 **DATA MANAGEMENT AND STATISTICAL ANALYSIS**

42 Missing data of questionnaires will be minimized using RadQuest, since items cannot be skipped. In  
43 case of missing data for other variables, the likeliness of this being missing at random will be  
44 assessed. If missing data is random, we will use appropriate imputation methods.[60]  
45  
46  
47  
48  
49

50 All statistical analyses will be performed using statistics software (SPSS V.25.0 for Windows, Chicago,  
51 Illinois, USA). First, to characterize transitions over time in fatigue, we will use latent transition  
52 analysis.[61] Second, to identify the factors that precipitate and/or perpetuate fatigue in patients  
53 with COPD, mixed model analyses will be applied for continuous outcomes measures and generalized  
54 estimating equations for dichotomous outcomes measures. Third, to study the impact of  
55  
56  
57  
58  
59

1  
2  
3 exacerbation-related hospitalizations on fatigue and its perpetuating factors we will use mixed model  
4 analyses. Fourth, to better understand the extent to which baseline fatigue is related to 2-year all-  
5 cause hospitalization and mortality, Cox proportional hazard models will be applied. At last, to  
6 identify whether there are diurnal differences in fatigue and what factors are associated with these  
7 variations, we will use hierarchical linear modelling as items are nested within moments and  
8 moments are nested within individuals. The responsiveness and sensitivity of the fatigue  
9 questionnaire versus EMA data are compared with effect sizes (Cohen's d) for the component of  
10 observed change derived from model parameters. *A priori*, a two-tailed p-value of <0.05 is  
11 considered significant.  
12  
13  
14  
15  
16  
17  
18  
19

### 20 **ETHICS AND DISSEMINATION**

21 This study will be conducted according to the principles of the Declaration of Helsinki (64<sup>th</sup> WMA  
22 General Assembly, Fortaleza, Brazil, October 2013) and in accordance with the Medical Research  
23 Involving Human Subject Act (WMO). MEC United approved the study on December 22, 2017  
24 (R17.036/NL60484.100.17). The study was registered on [www.trialregister.nl](http://www.trialregister.nl) on January 8, 2018. The  
25 results will be submitted for publication in peer-reviewed journals and will be presented at  
26 (inter)national conferences.  
27  
28  
29  
30  
31  
32

### 33 **DISCUSSION**

34 The *FAntasTIGUE* study has been designed to identify the factors that perpetuate and/or precipitate  
35 mild to severe fatigue in patients with COPD. The novel findings will hopefully further guide the  
36 development of tailored interventions, which –in turn- will help to diminish the impact on daily life of  
37 this important yet ignored symptom.  
38  
39  
40  
41  
42  
43

### 44 **STRENGTHS**

45 A major strength of the *FAntasTIGUE* study is that a wide range of possible precipitating and  
46 perpetuating factors will be tested concurrently in one model of stable patients with COPD.  
47 Moreover, the *FAntasTIGUE* study also examines the impact of an exacerbation-related  
48 hospitalization on fatigue. This way, we aim to identify relevant factors that explain variance in  
49 fatigue. Another strength of this study is the use of EMA to capture diurnal variations of fatigue in  
50 patients with COPD. In comparison with the usual web-based or paper-and-pencil questionnaires,  
51 data gathered via EMA are not subject to recall bias and provide us with a film of variations in the  
52 patient's fatigue in their natural environment rather than a snapshot. To our knowledge, this is the  
53  
54  
55  
56  
57  
58  
59  
60

1  
2  
3 first study that uses EMA to evaluate fatigue in a population of patients with COPD. The information  
4 about the diurnal variations of fatigue will further help us to tailor interventions for reducing fatigue  
5 in patients with COPD. Moreover, EMA provides us with contextual information of factors that could  
6 precipitate or perpetuate fatigue. A methodological strength of this study is the longitudinal design.  
7 It enables us to examine the association between fatigue, exacerbation-related hospitalizations and  
8 mortality. Moreover, it allows us to investigate if the associations between fatigue and the  
9 precipitating and perpetuating factors are temporarily or can change over time. And last, the  
10 structure of the *FAntasTIGUE* consortium, including a steering committee and a patient's advisory  
11 board, allows us to improve the research capacity, to share (academic) resources, to disseminate  
12 study results and to speed up future research.  
13  
14  
15  
16  
17  
18  
19  
20  
21

### 22 **LIMITATIONS**

23 The present study may encounter the following limitations: *first*, despite the benefits of repeated  
24 measurements in longitudinal studies, higher drop-out rates are expected as disease progresses. This  
25 attrition could result in a biased sample, which may compromise the study's generalizability. To limit  
26 the loss to follow-up, we will minimize the burden as much as possible and keep close contact with  
27 the patients. The patient advisory board has been intimately involved in the design of the  
28 *FAntasTIGUE* project to balance patient burden and number of variables that needed to be assessed  
29 to identify the factors that perpetuate and/or precipitate mild to severe fatigue in patients with  
30 COPD. *Second*, the current study selection is based on convenience sampling. This may cause  
31 selection bias, since participants with a lack of motivation and a higher disease burden are less likely  
32 to respond. We will try to prevent selection bias, by inviting all patients who are diagnosed with  
33 COPD either via their physician during consultation hour or via their own general practitioner. *Third*,  
34 together with the steering committee and patient advisory board the perpetuating- and precipitating  
35 factors that will be evaluated have been carefully selected. However, we still may miss other factors  
36 that potentially contribute to fatigue in COPD.  
37  
38  
39  
40  
41  
42  
43  
44  
45  
46

### 47 **CLINICAL IMPLICATIONS**

48 The results of the *FAntasTIGUE* study will contribute to a better understanding of the physical,  
49 psychological, behavioural, and systemic factors that precipitate and/or perpetuate fatigue in  
50 patients with COPD when studied concurrently. Furthermore, it will give us more insight in the  
51 diurnal variations of fatigue and the impact of exacerbations on fatigue. These findings will provide  
52 further guidance for the development of fatigue-reducing and coping interventions to improve the  
53  
54  
55  
56  
57  
58  
59  
60

1  
2  
3 daily functioning of patients with COPD. This will be an important first step in the management of  
4 COPD-related fatigue.  
5  
6  
7

#### 8 **AUTHORS' CONTRIBUTIONS**

9 YMJG and ML are responsible for the recruitment, data collection and data analysis. JHV is the  
10 principal investigator of Radboud university medical centre, EFWM is the principal investigator of  
11 Maastricht University Medical Centre, and MAS is the project leader. Together with DJAJ, MSYT,  
12 JBPe, CB, JWMM, MAGS, and JBPr they form the FAntasTIGUE consortium, and are responsible for  
13 the design, recruitment, and interpretation of the results. YM and AC are members of the patient  
14 advisory board. All authors contributed to the writing of this manuscript, read and approved the final  
15 version of the manuscript.  
16  
17  
18  
19  
20  
21  
22  
23

#### 24 **FUNDING STATEMENT**

25 This project is supported by grant 4.1.16.085 of Lung Foundation Netherlands, Leusden, the  
26 Netherlands; AstraZeneca Netherlands; Boehringer Ingelheim Netherlands; and Stichting Astma  
27 Bestrijding, Amsterdam, the Netherlands.  
28  
29  
30  
31

#### 32 **COMPETING INTEREST STATEMENTS**

33 Prof. Spruit discloses receiving personal remuneration for consultancy and/or lectures from  
34 Boehringer Ingelheim, GSK, Novartis, and AstraZeneca outside the scope of this work.  
35  
36  
37  
38  
39  
40  
41  
42  
43  
44  
45  
46  
47  
48  
49  
50  
51  
52  
53  
54  
55  
56  
57  
58  
59  
60

## REFERENCES

- 1 Janson-Bjerklie S, Carrieri VK, Hudes M. The sensations of pulmonary dyspnea. *Nursing research* 1986;35(3):154-9.
- 2 Kapella MC, Larson JL, Patel MK, et al. Subjective fatigue, influencing variables, and consequences in chronic obstructive pulmonary disease. *Nursing research* 2006;55(1):10-7.
- 3 Stridsman C, Skar L, Hedman L, et al. Fatigue Affects Health Status and Predicts Mortality Among Subjects with COPD: Report from the Population-Based OLIN COPD Study. *Copd* 2015;12(2):199-206.
- 4 Peters JB, Heijdra YF, Daudey L, et al. Course of normal and abnormal fatigue in patients with chronic obstructive pulmonary disease, and its relationship with domains of health status. *Patient education and counseling* 2011;85(2):281-5.
- 5 Baghai-Ravary R, Quint JK, Goldring JJ, et al. Determinants and impact of fatigue in patients with chronic obstructive pulmonary disease. *Respiratory medicine* 2009;103(2):216-23.
- 6 Janssen DJ, Spruit MA, Uszko-Lencer NH, et al. Symptoms, comorbidities, and health care in advanced chronic obstructive pulmonary disease or chronic heart failure. *Journal of palliative medicine* 2011;14(6):735-43.
- 7 van der Molen T, Willemse BW, Schokker S, et al. Development, validity and responsiveness of the Clinical COPD Questionnaire. *Health and quality of life outcomes* 2003;1:13.
- 8 Jones PW, Harding G, Berry P, et al. Development and first validation of the COPD Assessment Test. *The European respiratory journal* 2009;34(3):648-54.
- 9 Spruit MA, Vercoulen JH, Sprangers MAG, et al. Fatigue in COPD: an important yet ignored symptom. *The Lancet Respiratory medicine* 2017;5(7):542-44.
- 10 Rodriguez-Roisin R. Toward a consensus definition for COPD exacerbations. *Chest* 2000;117(5 Suppl 2):398s-401s.
- 11 Inal-Ince D, Savci S, Saglam M, et al. Fatigue and multidimensional disease severity in chronic obstructive pulmonary disease. *Multidisciplinary respiratory medicine* 2010;5(3):162-7.
- 12 Lewko A, Bidgood PL, Garrod R. Evaluation of psychological and physiological predictors of fatigue in patients with COPD. *BMC pulmonary medicine* 2009;9:47.
- 13 Woo K. A pilot study to examine the relationships of dyspnoea, physical activity and fatigue in patients with chronic obstructive pulmonary disease. *Journal of clinical nursing* 2000;9(4):526-33.
- 14 Breukink SO, Strijbos JH, Koorn M, et al. Relationship between subjective fatigue and physiological variables in patients with chronic obstructive pulmonary disease. *Respiratory medicine* 1998;92(4):676-82.
- 15 Hanania NA, Mullerova H, Locantore NW, et al. Determinants of depression in the ECLIPSE chronic obstructive pulmonary disease cohort. *American journal of respiratory and critical care medicine* 2011;183(5):604-11.

- 1  
2  
3 16 Al-shair K, Kolsum U, Dockry R, et al. Biomarkers of systemic inflammation and depression and  
4 fatigue in moderate clinically stable COPD. *Respiratory research* 2011;12:3.  
5  
6 17 Kentson M, Todt K, Skargren E, et al. Factors associated with experience of fatigue, and functional  
7 limitations due to fatigue in patients with stable COPD. *Therapeutic advances in respiratory disease*  
8 2016;10(5):410-24.  
9  
10 18 Postma D, Wijkstra P, Hiemstra P, et al. The Dutch National Program for Respiratory Research. *The*  
11 *Lancet Respiratory Medicine* 2016;4(5):356-7  
12  
13 19 From the Global Strategy for the diagnosis, management and prevention of COPD, global Initiative  
14 for Chronic Obstructive Lung Disease (GOLD) [27-10-2017]. Available from:  
15 <http://www.goldcopd.org/> accessed 27-10-2017.  
16  
17 20 Metsemakers JFM, Höppener P, Knottnerus JA, et al. Computerized health information in the  
18 Netherlands: a Registration network of family practices. *Br J Gen Pract* 1992;42:102-06.  
19  
20 21 Vercoulen JH, Swanink CM, Fennis JF, et al. Dimensional assessment of chronic fatigue syndrome.  
21 *Journal of psychosomatic research* 1994;38(5):383-92.  
22  
23 22 Beurskens AJ, Bultmann U, Kant I, et al. Fatigue among working people: validity of a questionnaire  
24 measure. *Occupational and environmental medicine* 2000;57(5):353-7.  
25  
26 23 Bultmann U, de Vries M, Beurskens AJ, et al. Measurement of prolonged fatigue in the working  
27 population: determination of a cutoff point for the checklist individual strength. *Journal of*  
28 *occupational health psychology* 2000;5(4):411-6.  
29  
30 24 Worm-Smeitink M, Gielissen M, Bloot L, et al. The assessment of fatigue: Psychometric qualities  
31 and norms for the Checklist individual strength. *Journal of psychosomatic research* 2017;98:40-46.  
32  
33 25 Repping-Wuts H, Fransen J, van Achterberg T, et al. Persistent severe fatigue in patients with  
34 rheumatoid arthritis. *Journal of clinical nursing* 2007;16(11c):377-83.  
35  
36 26 Servaes P, Gielissen MF, Verhagen S, et al. The course of severe fatigue in disease-free breast  
37 cancer patients: a longitudinal study. *Psycho-oncology* 2007;16(9):787-95.  
38  
39 27 Vercoulen JH, Daudey L, Molema J, et al. An Integral assessment framework of health status in  
40 chronic obstructive pulmonary disease (COPD). *International journal of behavioral medicine*  
41 2008;15(4):263-79.  
42  
43 28 Maes IH, Delespaul PA, Peters ML, et al. Measuring health-related quality of life by experiences:  
44 the experience sampling method. *Value in health : the journal of the International Society for*  
45 *Pharmacoeconomics and Outcomes Research* 2015;18(1):44-51.  
46  
47 29 Larson RWC, M. The experience sampling method. In H. Reis (Ed.), *New directions for naturalistic*  
48 *methods in the behavioral sciences*: San Francisco: Jossey-Bass 1983.  
49  
50  
51  
52  
53  
54  
55  
56  
57  
58  
59  
60



- 1  
2  
3 30 Andrykowski MA, Aarts MJ, van de Poll-Franse LV, et al. Low socioeconomic status and mental  
4 health outcomes in colorectal cancer survivors: disadvantage? advantage?... or both? *Psycho-*  
5 *oncology* 2013;22(11):2462-9.  
6  
7 31 Charlson ME, Pompei P, Ales KL, et al. A new method of classifying prognostic comorbidity in  
8 longitudinal studies: development and validation. *Journal of chronic diseases* 1987;40(5):373-83.  
9  
10 32 Carlsson AM. Assessment of chronic pain. I. Aspects of the reliability and validity of the visual  
11 analogue scale. *Pain* 1983;16(1):87-101.  
12  
13 33 Mahler DA, Wells CK. Evaluation of clinical methods for rating dyspnea. *Chest* 1988;93(3):580-6.  
14  
15 34 Schols AM, Wouters EF, Soeters PB, et al. Body composition by bioelectrical-impedance analysis  
16 compared with deuterium dilution and skinfold anthropometry in patients with chronic obstructive  
17 pulmonary disease. *The American journal of clinical nutrition* 1991;53(2):421-4.  
18  
19 35 Holland AE, Spruit MA, Troosters T, et al. An official European Respiratory Society/American  
20 Thoracic Society technical standard: field walking tests in chronic respiratory disease. *The European*  
21 *respiratory journal* 2014;44(6):1428-46.  
22  
23 36 Bernabeu-Mora R, Medina-Mirapeix F, Llamazares-Herran E, et al. The Short Physical Performance  
24 Battery is a discriminative tool for identifying patients with COPD at risk of disability. *International*  
25 *journal of chronic obstructive pulmonary disease* 2015;10:2619-26.  
26  
27 37 Bohannon RW, Andrews AW. Interrater reliability of hand-held dynamometry. *Physical therapy*  
28 1987;67(6):931-3.  
29  
30 38 Bechtol CO. Grip test; the use of a dynamometer with adjustable handle spacings. *The Journal of*  
31 *bone and joint surgery American volume* 1954;36-a(4):820-4; passim.  
32  
33 39 Aboyans V, Criqui MH, Abraham P, et al. Measurement and interpretation of the ankle-brachial  
34 index: a scientific statement from the American Heart Association. *Circulation* 2012;126(24):2890-  
35 909.  
36  
37 40 Houben-Wilke S, Jorres RA, Bals R, et al. Peripheral Artery Disease and Its Clinical Relevance in  
38 Patients with Chronic Obstructive Pulmonary Disease in the COPD and Systemic Consequences-  
39 Comorbidities Network Study. *American journal of respiratory and critical care medicine*  
40 2017;195(2):189-97.  
41  
42 41 De Boever P, Louwies T, Provost E, et al. Fundus photography as a convenient tool to study  
43 microvascular responses to cardiovascular disease risk factors in epidemiological studies. *Journal of*  
44 *visualized experiments : JoVE* 2014(92):e51904.  
45  
46 42 Peters JB, Daudey L, Heijdra YF, et al. Development of a battery of instruments for detailed  
47 measurement of health status in patients with COPD in routine care: the Nijmegen Clinical Screening  
48 Instrument. *Quality of life research : an international journal of quality of life aspects of treatment,*  
49 *care and rehabilitation* 2009;18(7):901-12.  
50  
51  
52  
53  
54  
55  
56  
57  
58  
59  
60

1  
2  
3 43 Herdman M, Gudex C, Lloyd A, et al. Development and preliminary testing of the new five-level  
4 version of EQ-5D (EQ-5D-5L). *Quality of life research : an international journal of quality of life*  
5 *aspects of treatment, care and rehabilitation* 2011;20(10):1727-36.

6  
7 44 Spinhoven P, Ormel J, Sloekers PP, et al. A validation study of the Hospital Anxiety and Depression  
8 Scale (HADS) in different groups of Dutch subjects. *Psychological medicine* 1997;27(2):363-70.

9  
10 45 Villeneuve S, Pepin V, Rahayel S, et al. Mild cognitive impairment in moderate to severe COPD: a  
11 preliminary study. *Chest* 2012;142(6):1516-23.

12  
13 46 Gielissen MF, Knoop H, Servaes P, et al. Differences in the experience of fatigue in patients and  
14 healthy controls: patients' descriptions. *Health and quality of life outcomes* 2007;5:36.

15  
16 47 Boer LM, Daudey L, Peters JB, et al. Assessing the stages of the grieving process in chronic  
17 obstructive pulmonary disease (COPD): validation of the Acceptance of Disease and Impairments  
18 Questionnaire (ADIQ). *International journal of behavioral medicine* 2014;21(3):561-70.

19  
20 48 Vercoulen JH, Swanink CM, Galama JM, et al. The persistence of fatigue in chronic fatigue  
21 syndrome and multiple sclerosis: development of a model. *Journal of psychosomatic research*  
22 1998;45(6):507-17.

23  
24 49 Jacobsen PB, Andrykowski MA, Thors CL. Relationship of catastrophizing to fatigue among women  
25 receiving treatment for breast cancer. *Journal of consulting and clinical psychology* 2004;72(2):355-  
26 61.

27  
28 50 Kwakkenbos L, van den Hoogen FH, Custers J, et al. Validity of the Fear of Progression  
29 Questionnaire-Short Form in patients with systemic sclerosis. *Arthritis care & research*  
30 2012;64(6):930-4.

31  
32 51 Hibbard JH, Mahoney ER, Stockard J, et al. Development and testing of a short form of the patient  
33 activation measure. *Health services research* 2005;40(6 Pt 1):1918-30.

34  
35 52 Rabinovich RA, Louvaris Z, Raste Y, et al. Validity of physical activity monitors during daily life in  
36 patients with COPD. *The European respiratory journal* 2013;42(5):1205-15.

37  
38 53 Buysse DJ, Reynolds CF, 3rd, Monk TH, et al. The Pittsburgh Sleep Quality Index: a new instrument  
39 for psychiatric practice and research. *Psychiatry research* 1989;28(2):193-213.

40  
41 54 Johns MW. A new method for measuring daytime sleepiness: the Epworth sleepiness scale. *Sleep*  
42 1991;14(6):540-5.

43  
44 55 Servaes P, Verhagen S, Bleijenberg G. Determinants of chronic fatigue in disease-free breast  
45 cancer patients: a cross-sectional study. *Annals of oncology : official journal of the European Society*  
46 *for Medical Oncology* 2002;13(4):589-98.

47  
48 56 Bergner M, Bobbitt RA, Carter WB, et al. The Sickness Impact Profile: development and final  
49 revision of a health status measure. *Medical care* 1981;19(8):787-805.

1  
2  
3 57 Sonderen E. Het meten van sociale steun met de Sociale Steun Lijst-Interacties (SSLI-I) en de  
4 Sociale Steun Lijst-Discrepancies (SSL-D), een handleiding [Assessing social support with the Social  
5 Support List-Interactions (SSL-I) and the social support list-discrepancies, a manual]. *Noordelijk*  
6 *Centrum voor Gezondheidsvraagstukken* 1993.

7  
8  
9 58 Faul F, Erdfelder E, Lang AG, et al. G\*Power 3: a flexible statistical power analysis program for the  
10 social, behavioral, and biomedical sciences. *Behavior research methods* 2007;39(2):175-91.

11  
12 59 Gelman A, Hill J. Multilevel power calculation using fake-data simulation: data analysis using  
13 regression and multilevel/hierarchical models. New York: Cambridge University Press 2007.

14  
15 60 Sterne JA, White IR, Carlin JB, et al. Multiple imputation for missing data in epidemiological and  
16 clinical research: potential and pitfalls. *BMJ (Clinical research ed)* 2009;338:b2393.

17  
18 61 Collins LM, Lanza ST. Latent class and latent transition analysis: With applications in the social,  
19 behavioral, and health sciences: John Wiley & Sons 2013.

## 20 21 22 23 24 25 **FIGURE LEGENDS**

26 *Figure 1 Timeline: measurements will be performed at baseline, and at months 4, 8 and 12. Additional measurements will be*  
27 *carried out when a non-elective, exacerbation-related hospitalization occurs. Patients will be followed-up at month 18 and*  
28 *24.*

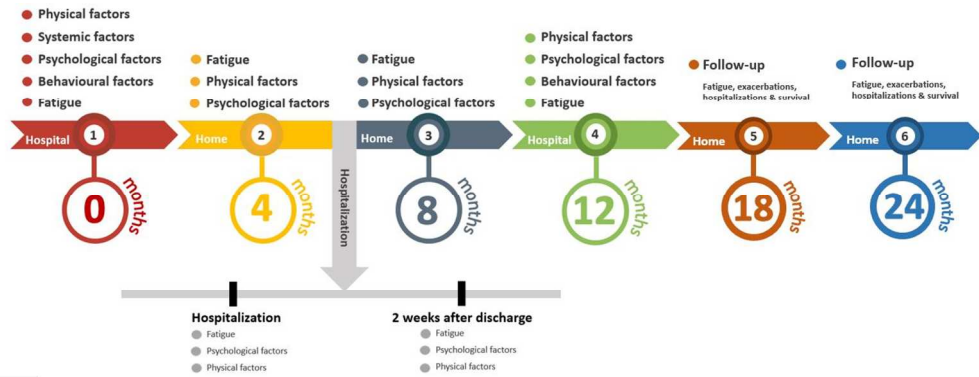

Figure 1 Timeline: measurements will be performed at baseline, and at months 4, 8 and 12. Additional measurements will be carried out when a non-elective, exacerbation-related hospitalization occurs. Patients will be followed-up at month 18 and 24.

114x43mm (300 x 300 DPI)
